# Supplementary material for: A gene expression signature of TREM2hi macrophages and γδ T cells predicts immunotherapy response
Source: PubMed Central journal article supplement (PMC7545100; doi:10.1038/s41467-020-18546-x), 2020-10-08
Supplement: 41467_2020_18546_MOESM1_ESM.pdf [file 41467_2020_18546_MOESM1_ESM.pdf]

## **Supplementary Information**

A gene expression signature of TREM2<sup>hi</sup> macrophages and  $\gamma\delta$  T cells predicts immunotherapy response.

Xiong et al.

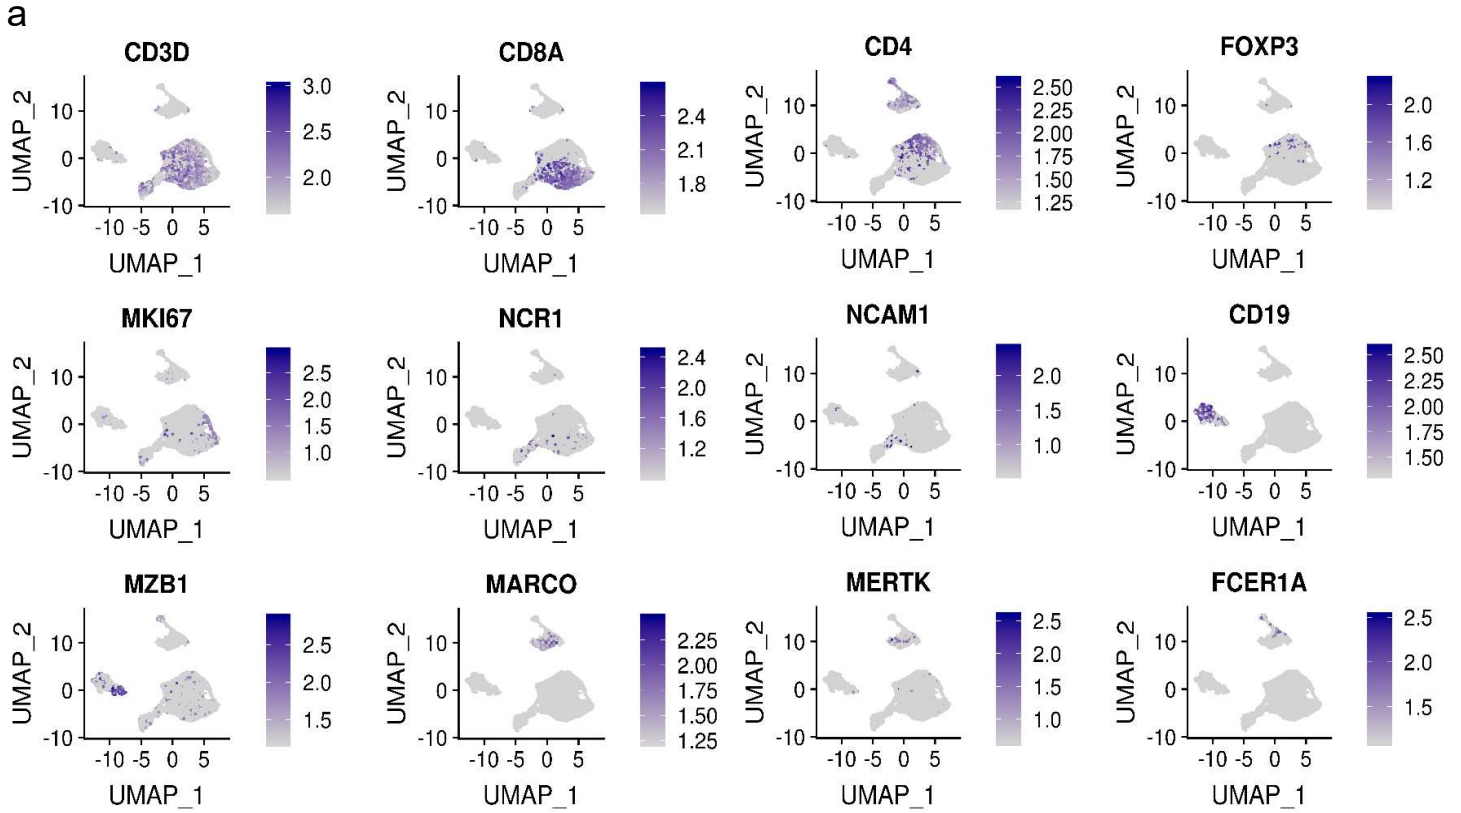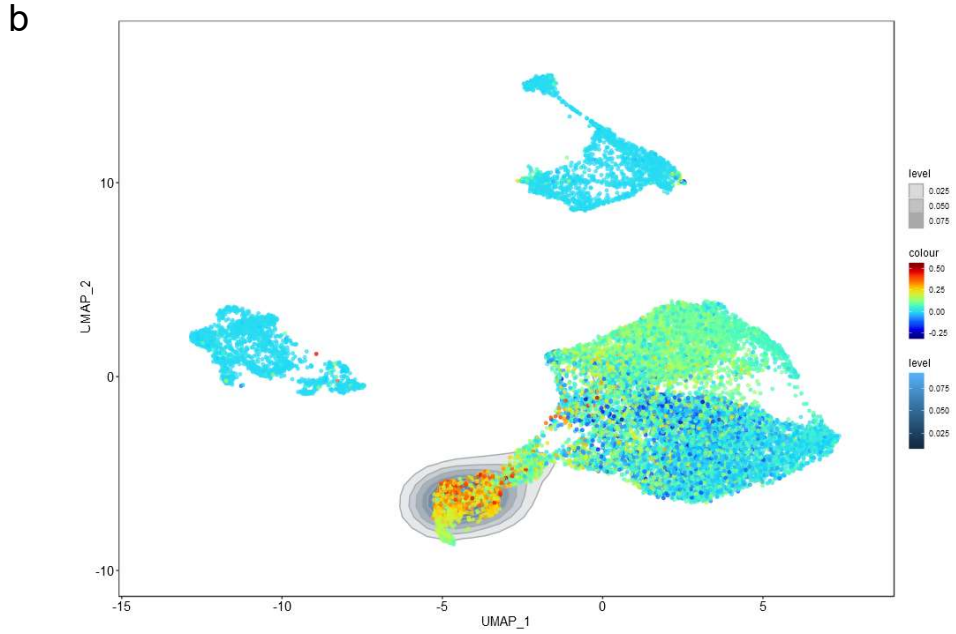

Supplementary Figure 1. The characterization of the ten major immune cell populations according to their respective canonical marker expression status. The scRNA-seq dataset - GSE120575 was used in this analysis. (a) The expression of canonical marker genes in different clusters of single cells; (b) Validation of our defined  $\gamma\delta$  T lymphocytes by the expression of the published gene expression signatures of  $\gamma\delta$  T cells.

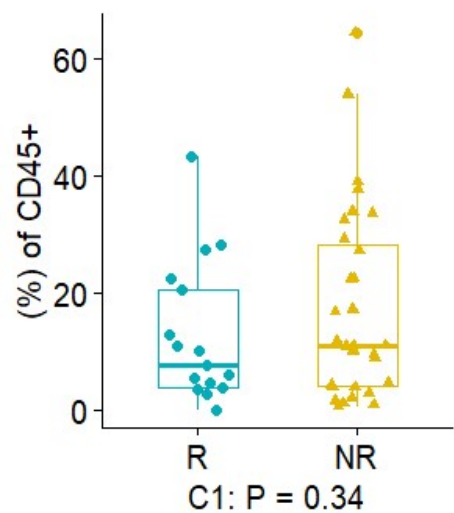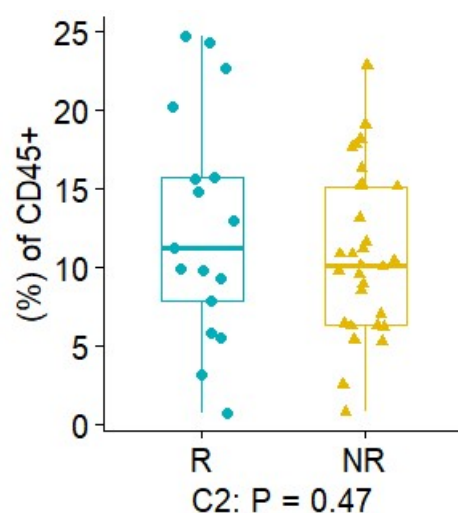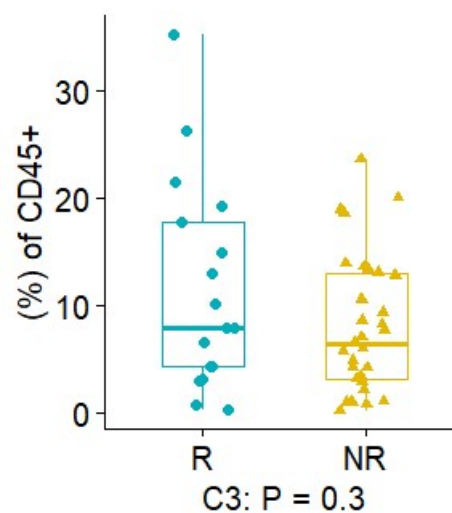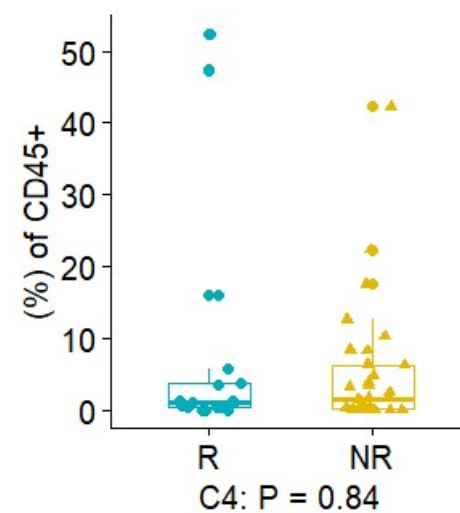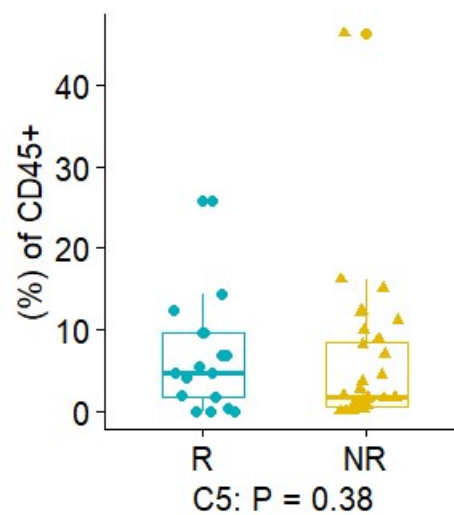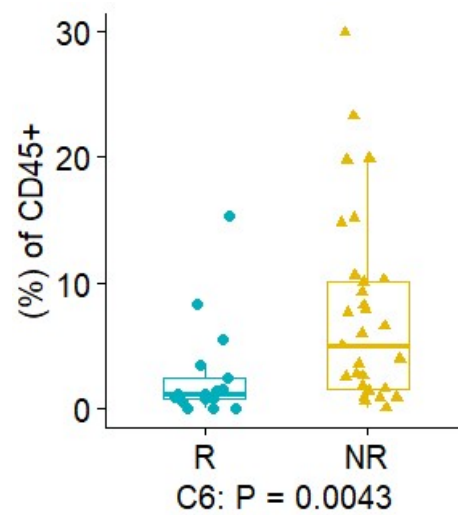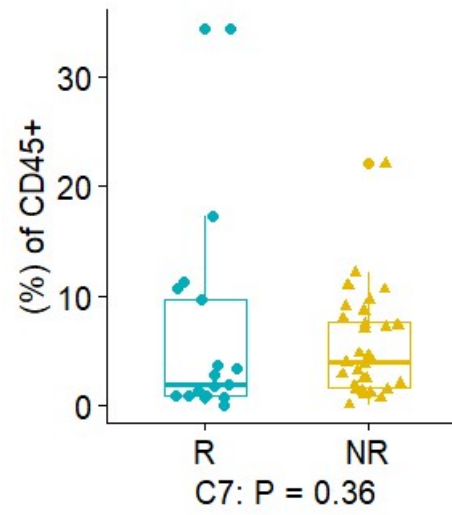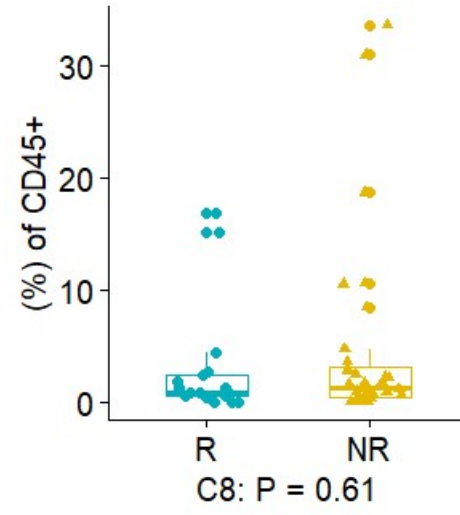

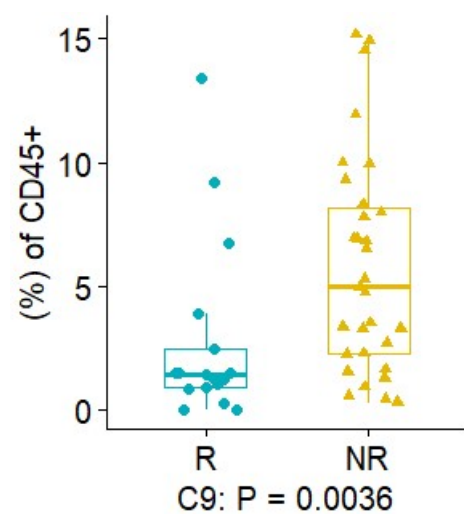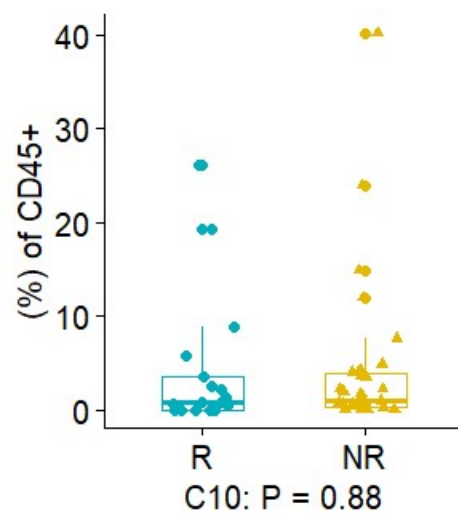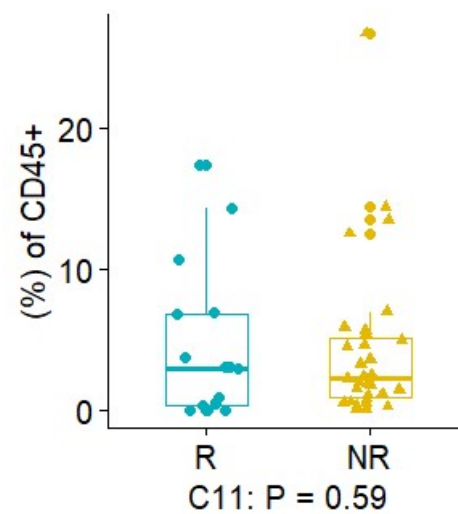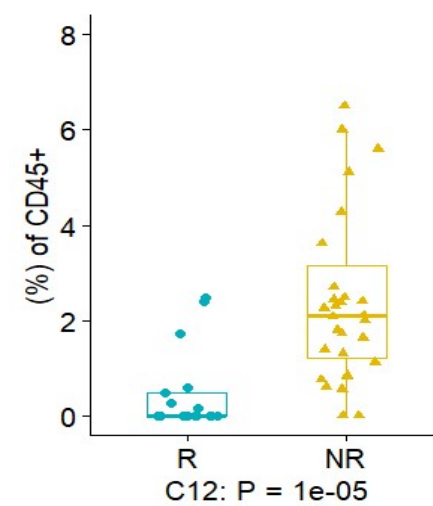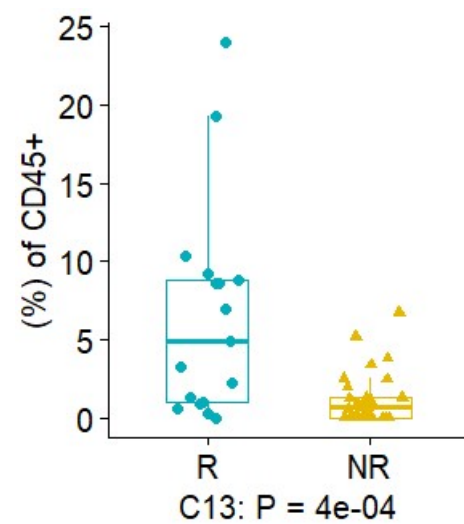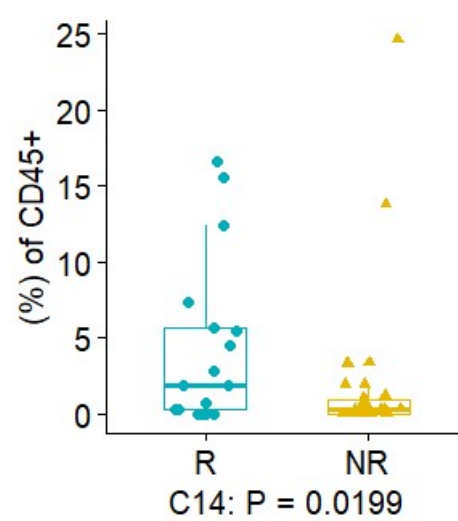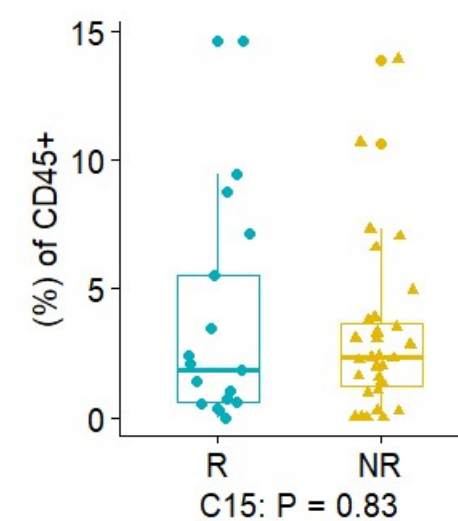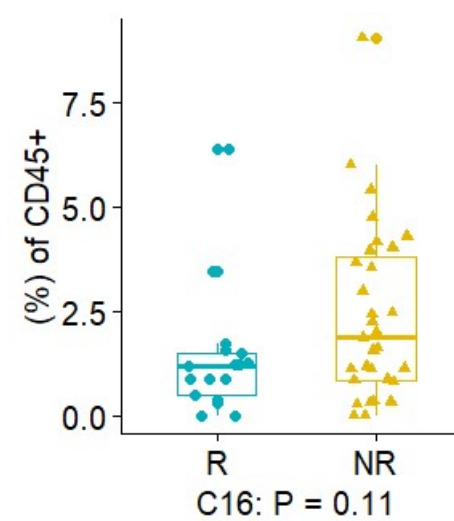

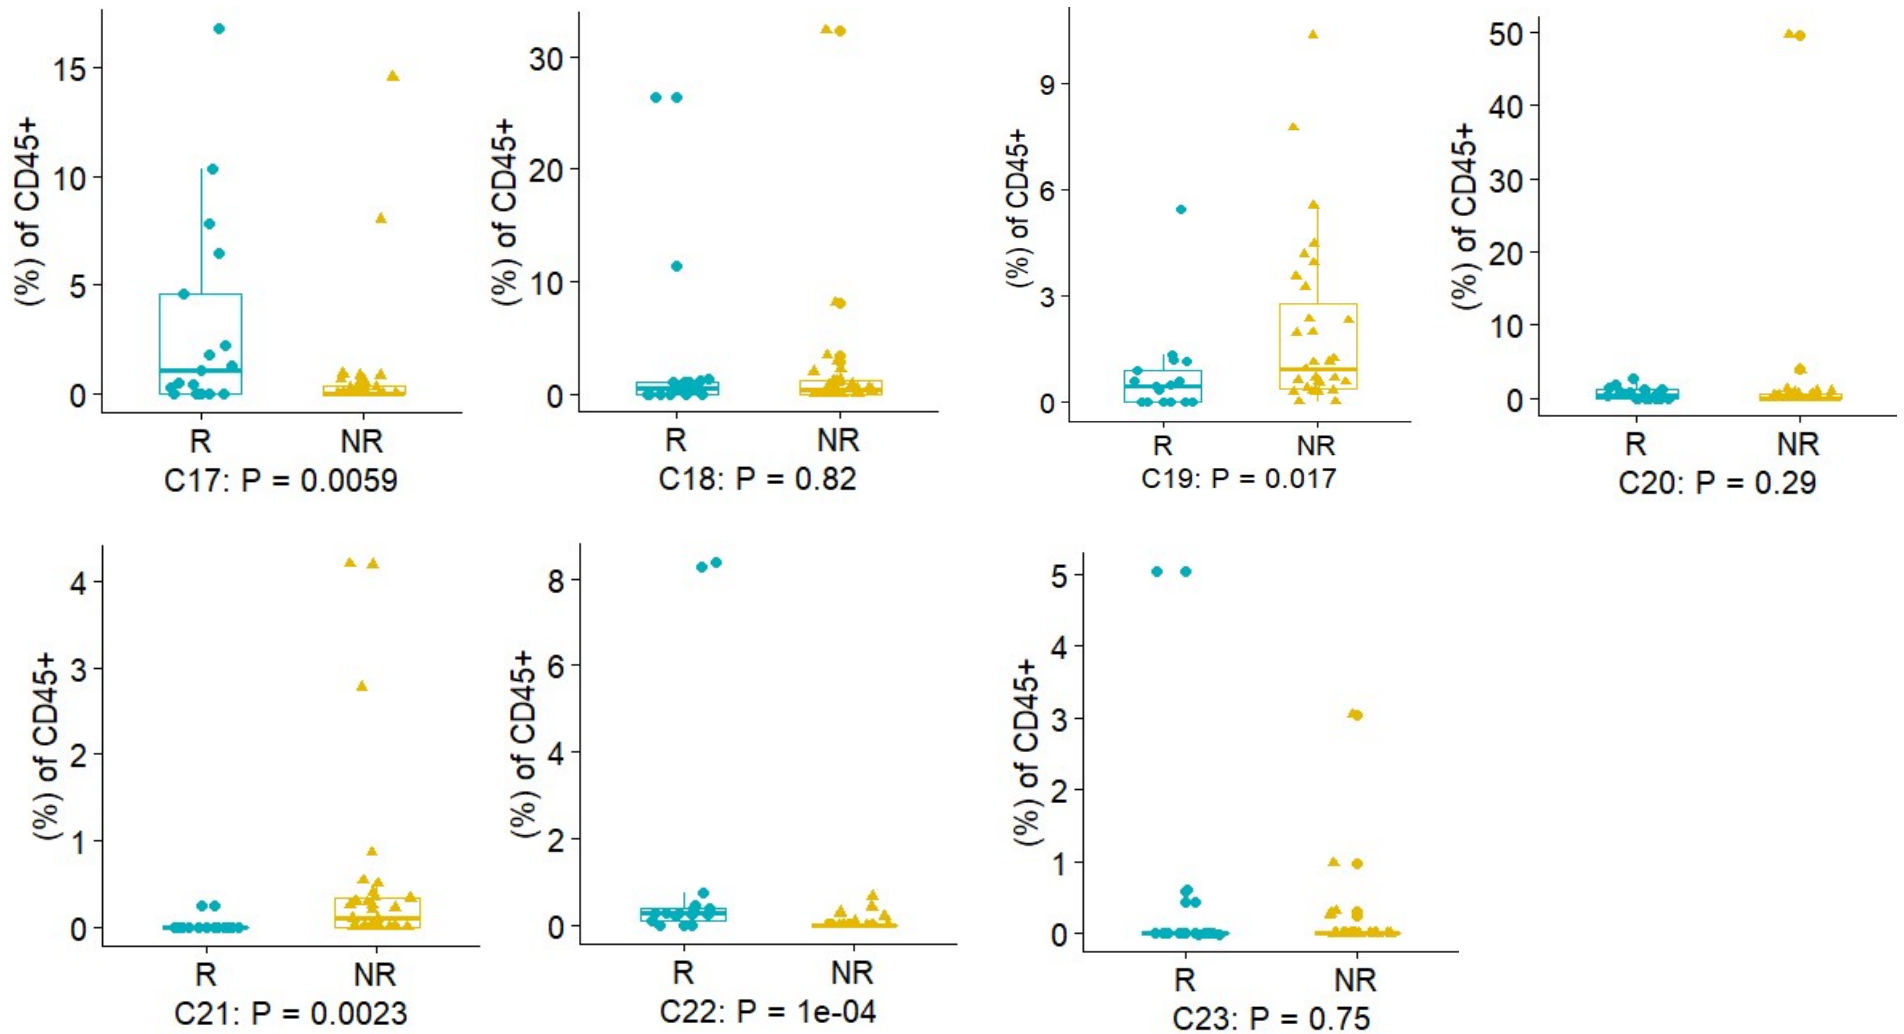

Supplementary Figure 2. Comparison of the abundance of each immune cell subset between the immune checkpoint therapy responder and non-responder groups. The scRNA-seq dataset - GSE120575 was used in this analysis. Boxplots showing the results of the Wilcoxon tests at the patient level for each of the 23 immune cell clusters were presented. There were 17 samples for the responder group and 31 samples for the non-responder group. Center line, median. Box limits, upper and lower quartiles. Whiskers, 1.5 interquartile range. Points beyond whiskers, outliers. The two-sided Wilcoxon tests were performed with no adjustment for multiple comparisons.

a

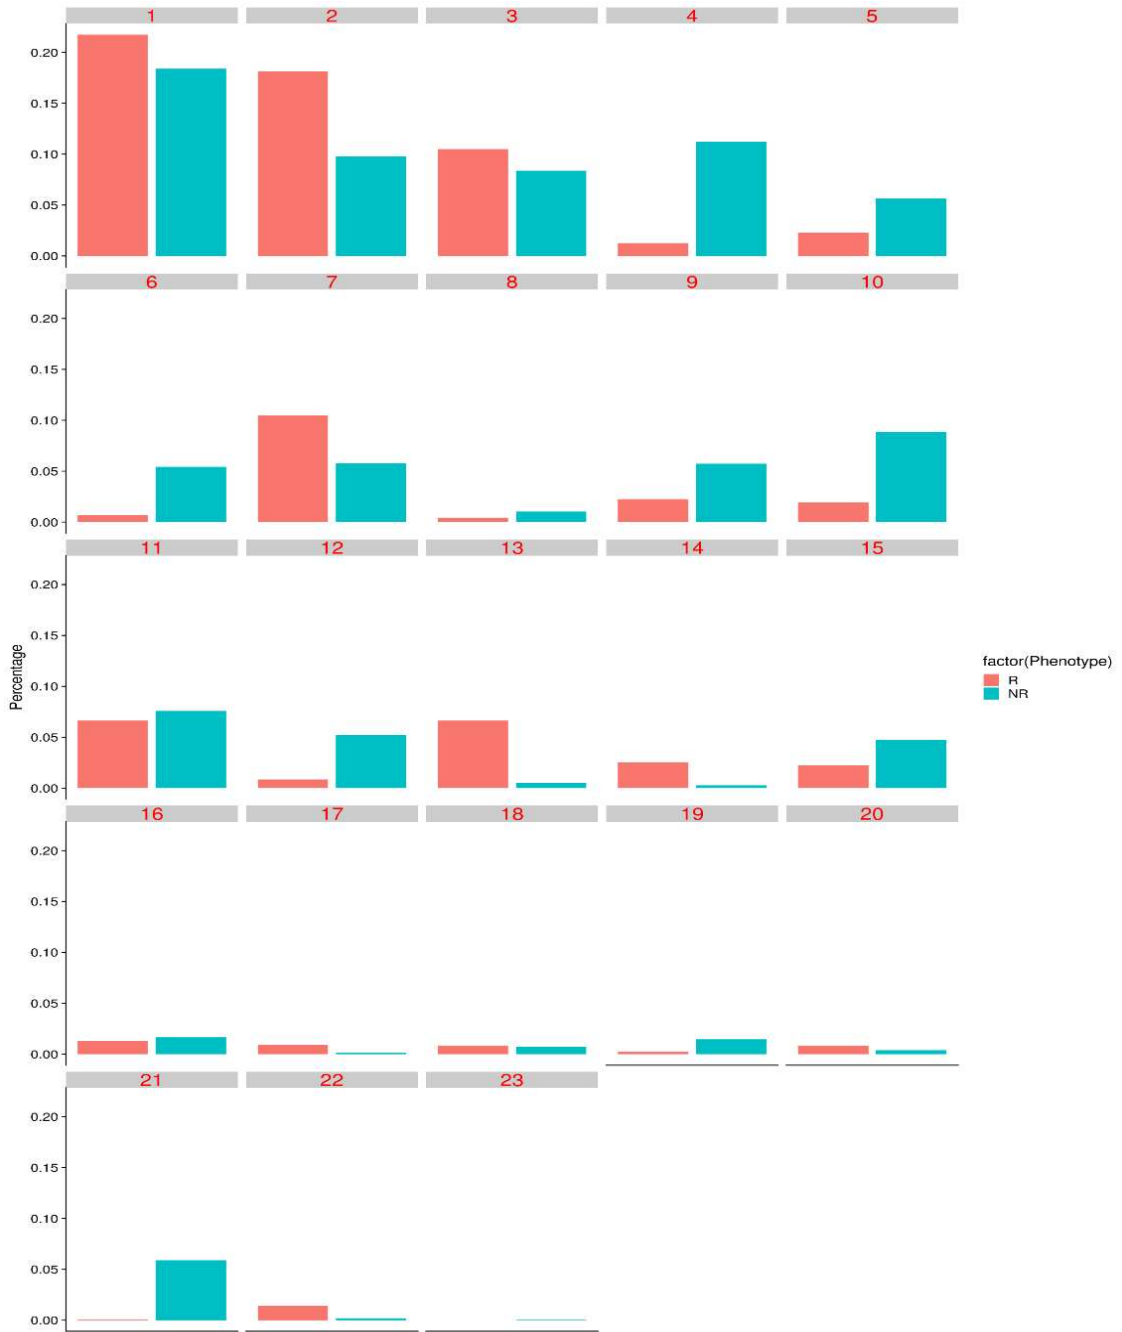

b

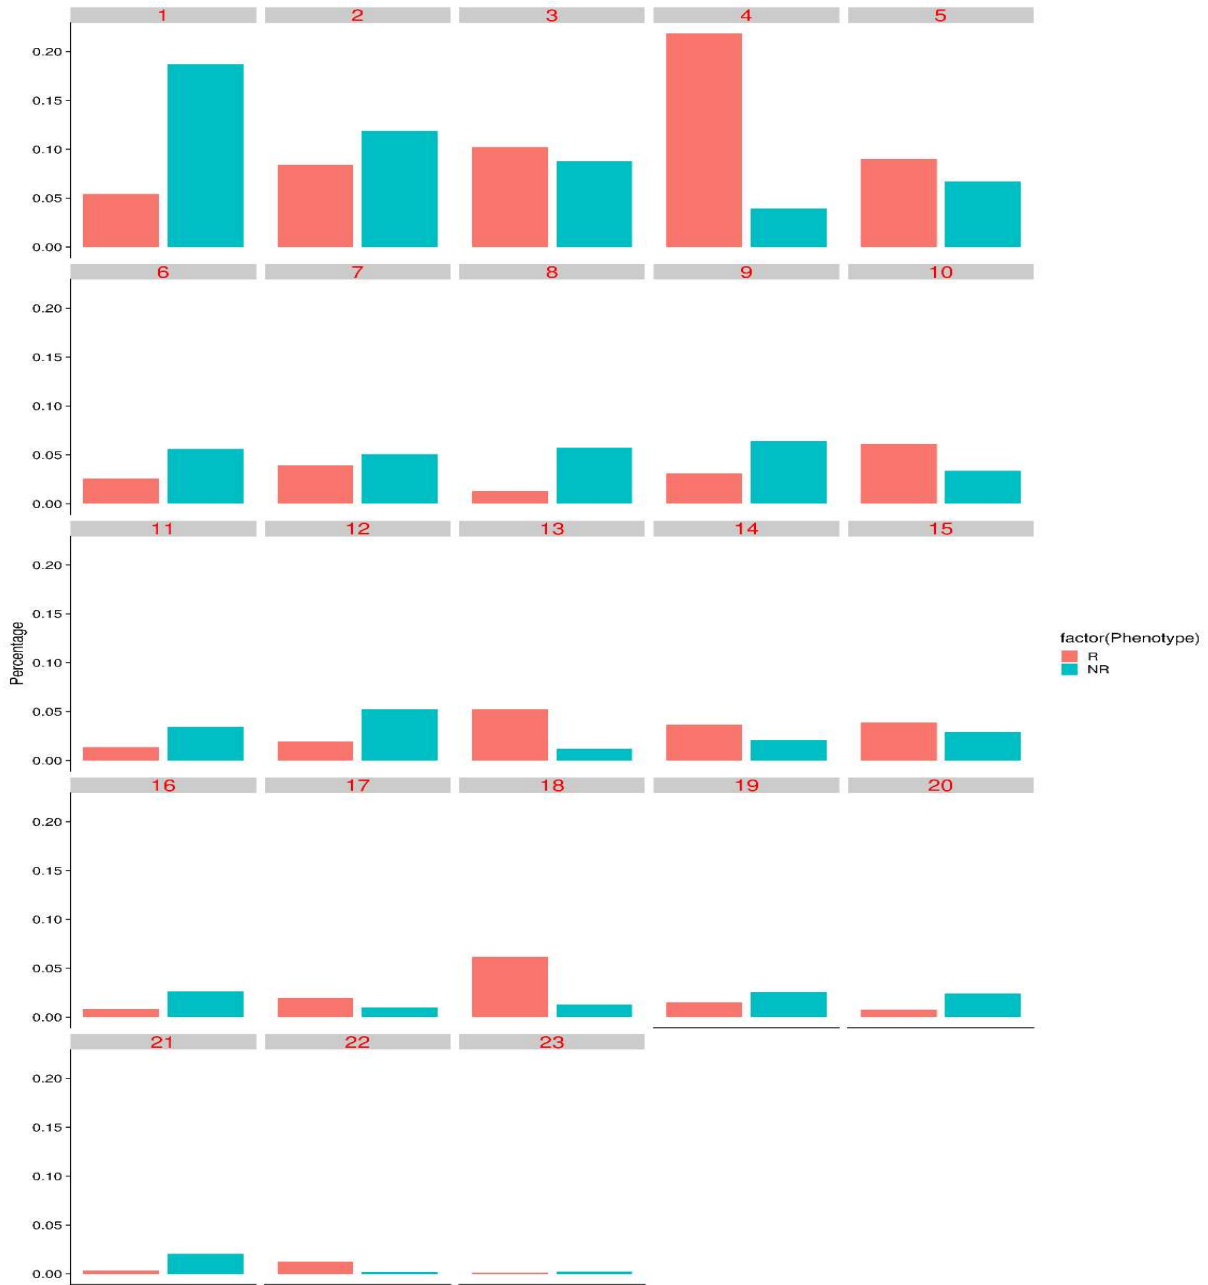

**C**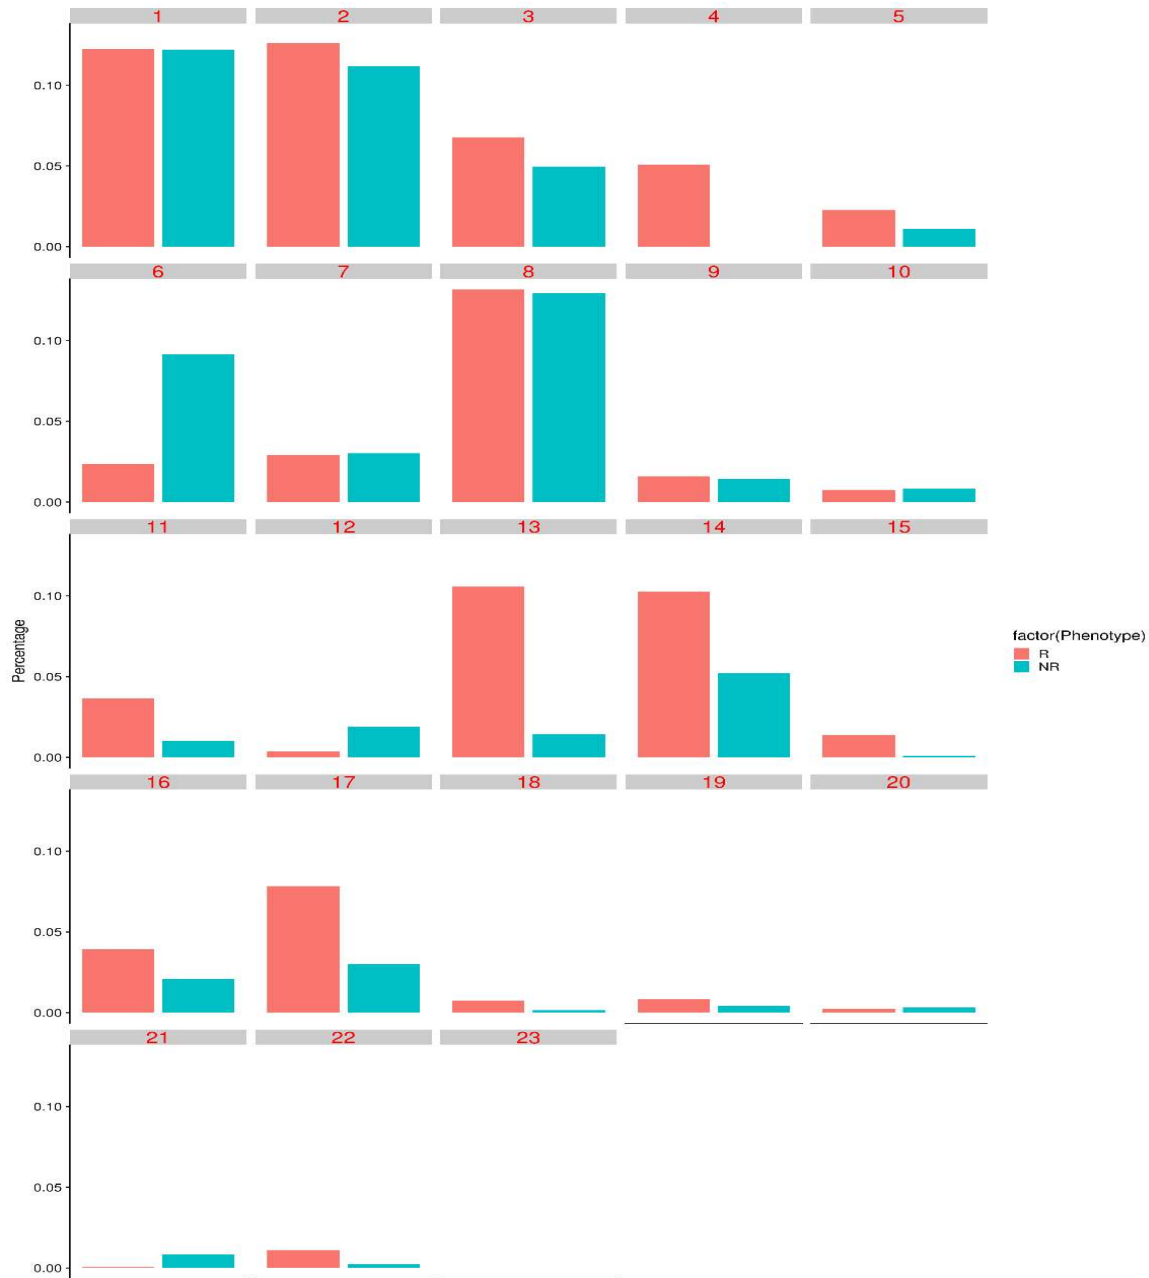

Supplementary Figure 3. Cell abundance comparison stratified by treatment schemes. The scRNA-seq dataset - GSE120575 was used in this analysis. The percentages (% of CD45+ cells) of each of the 23 single-cell clusters for the responders (R) and non-responders (NR) groups of melanoma samples collected in the three scenarios. (a) before anti-PD-1 treatment; (b) after anti-PD-1 treatment; (c) after anti-CTLA4+anti-PD-1 treatment. No enough single cells were available for comparison between responders and non-responders for other scenarios. For the after anti-PD-1 treatment melanoma samples, the denominators for the R and the NR groups are 1524 and 6334, respectively; for the after anti-CTLA4 plus anti-PD-1 treatment melanoma samples, the denominators for the R and the NR groups are 1315 and 1190, respectively.



## All Macrophages

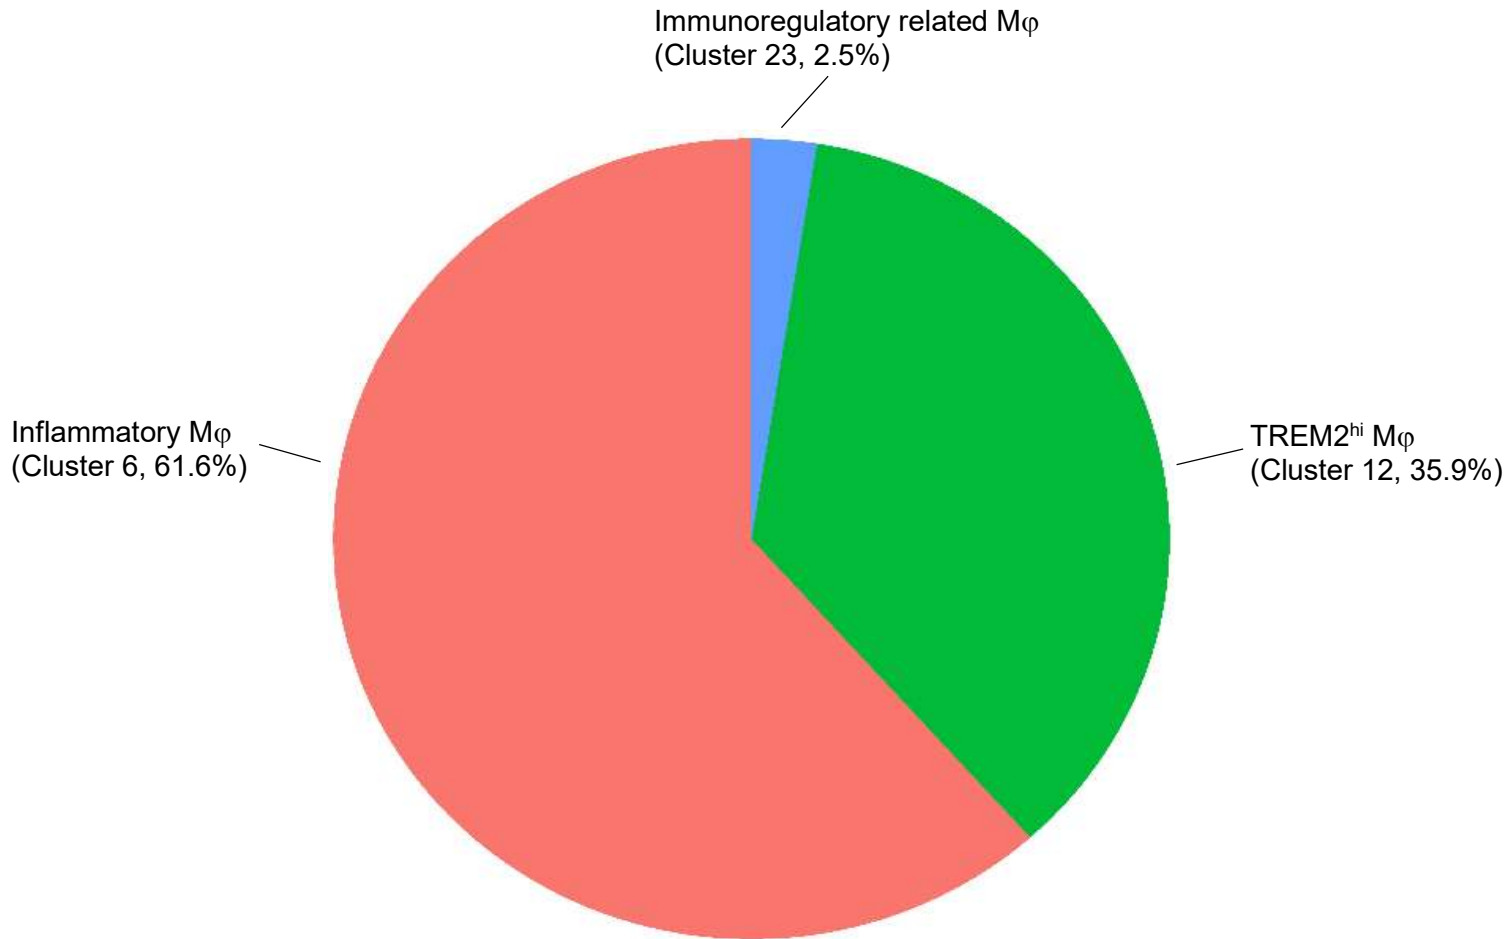

Supplementary Figure 4. Fraction of each macrophage subsets. The scRNA-seq dataset - GSE120575 was used in this analysis. Proportions of inflammatory macrophages (cluster 6), TREM2<sup>hi</sup> macrophages (cluster 12), and Immunoregulatory related macrophages (cluster 23), the three macrophage subsets in immune cells from the melanoma tumor samples.

### Inflammatory response 1

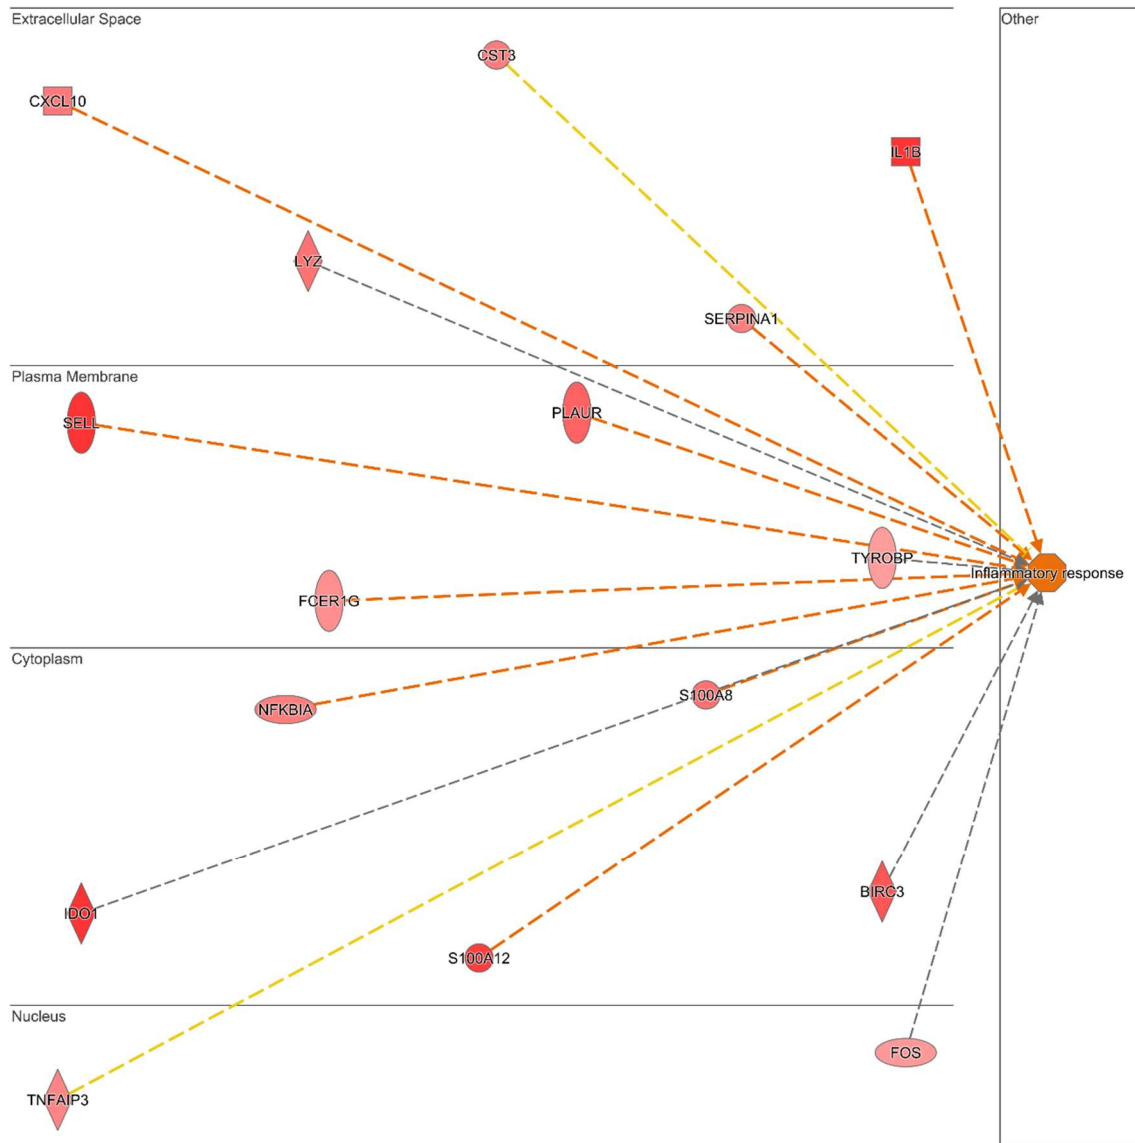

Supplementary Figure 5. Pathway analysis for macrophage cluster 6. The scRNA-seq dataset - GSE120575 was used in this analysis. IPA analyses based on the list of differentially expressed genes between cluster 6 and other macrophages. The results revealed that inflammatory response was significantly activated with a large number of overexpressed inflammatory marker genes in cluster 6 macrophages (adjusted  $P = 3.93E-10$ , activation Z score = 2.01). Cluster 6 macrophages population was thus identified as the 'Inflammatory  $M\phi$ '.

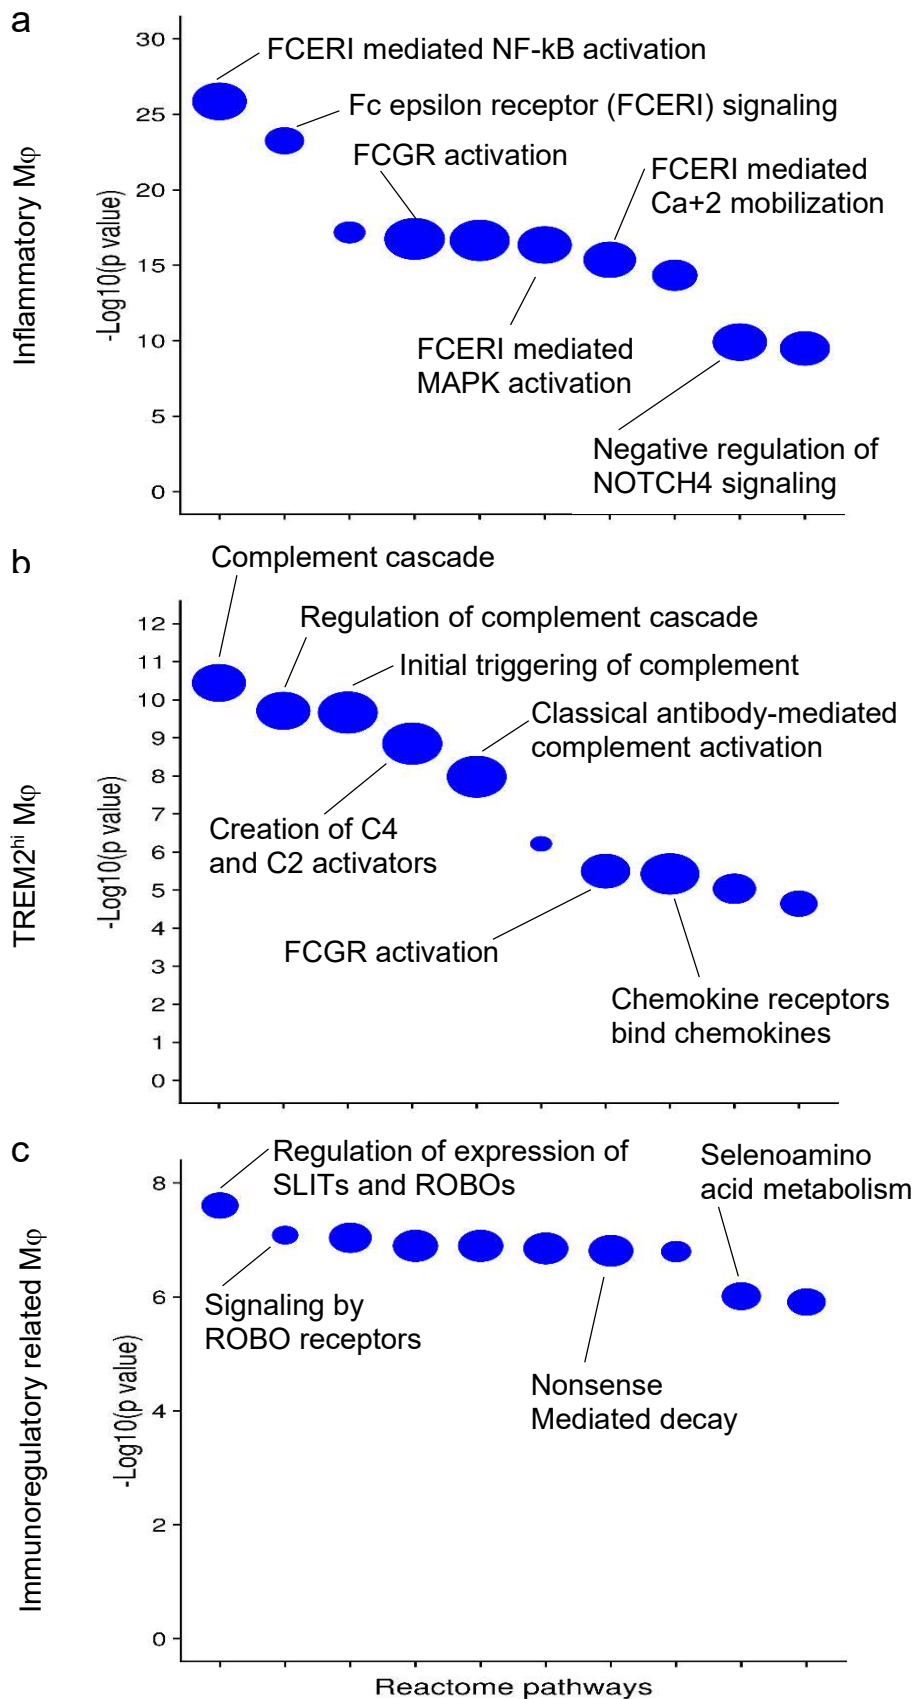

Supplementary Figure 6. Gene ontology enrichment analysis of three macrophages subsets. The scRNA-seq dataset - GSE120575 was used in this analysis. Gene ontology enrichment analysis of reactome pathways in (a) Inflammatory macrophages, (b) TREM2<sup>hi</sup> macrophages, and (c) Immunoregulatory related macrophages infiltrating the melanoma tumor samples from patients subjected to ICT. Size of the circles is proportional to the fold difference.

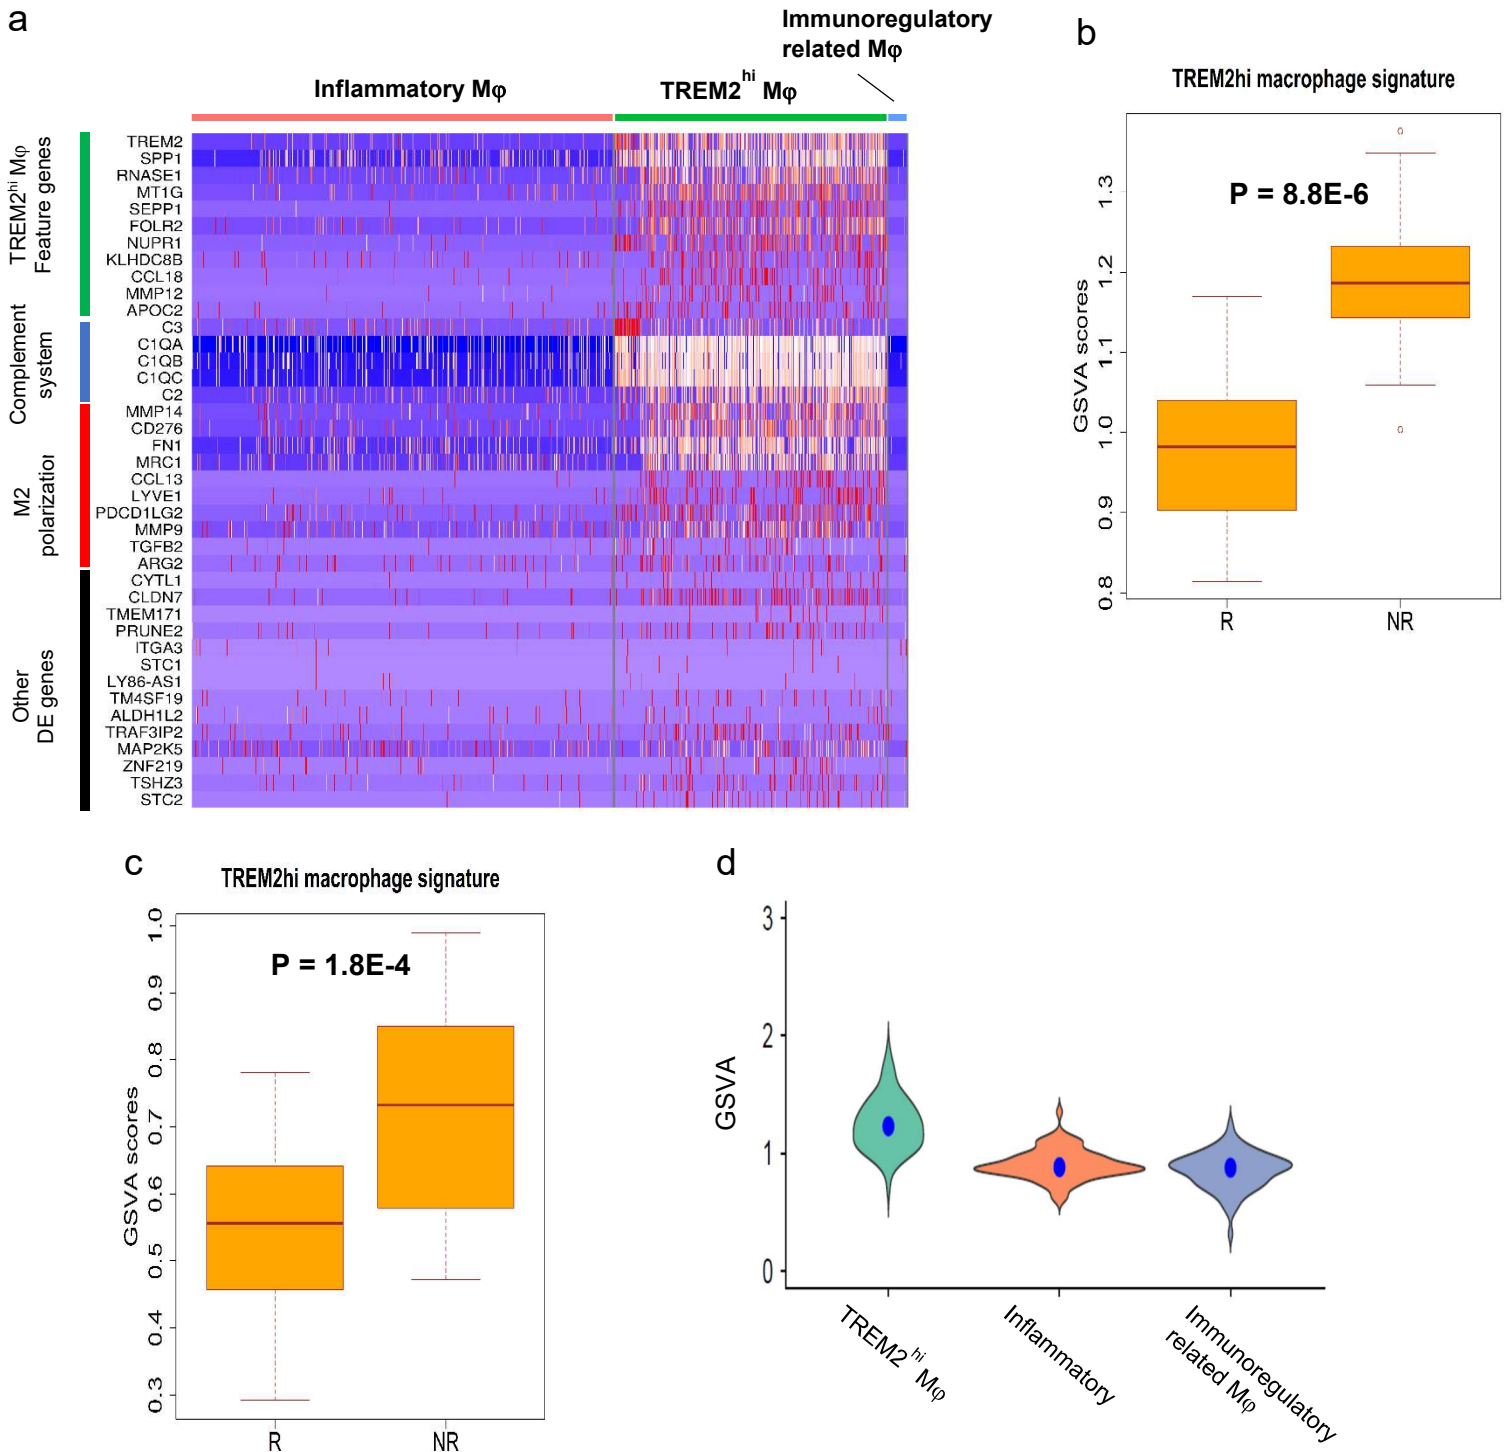

Supplementary Figure 7. A 40-gene expression signature that can characterize the TREM2<sup>hi</sup> macrophage population. (a) The scRNA-seq dataset - GSE120575 was analyzed, which generated the heatmap of the expression of a 40-gene signature representing the TREM2<sup>hi</sup> macrophage population. In the boxplots for (b) GSE78220 dataset and (c) GSE91061 dataset, the GSVA scores of the TREM2<sup>hi</sup> macrophage geneset were significantly higher in the ICT non-responding tumors than the responding tumors. Center line, median. Box limits, upper and lower quartiles. Whiskers, 1.5 interquartile range. Points beyond whiskers, outliers. For (b) and (c), the two-sided t-tests were performed with no adjustment for multiple comparisons. (d) Violin plot showed that the activity of this gene set is higher in the TREM2<sup>hi</sup> macrophages compared to the other macrophages in the GSE120575 dataset.

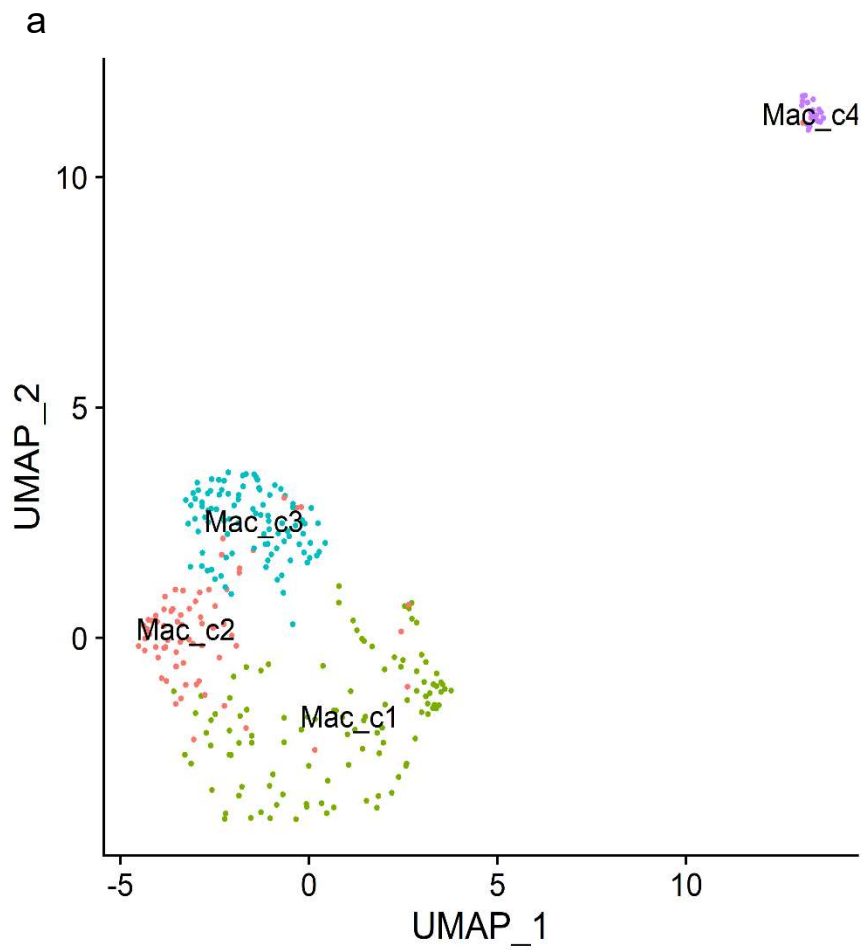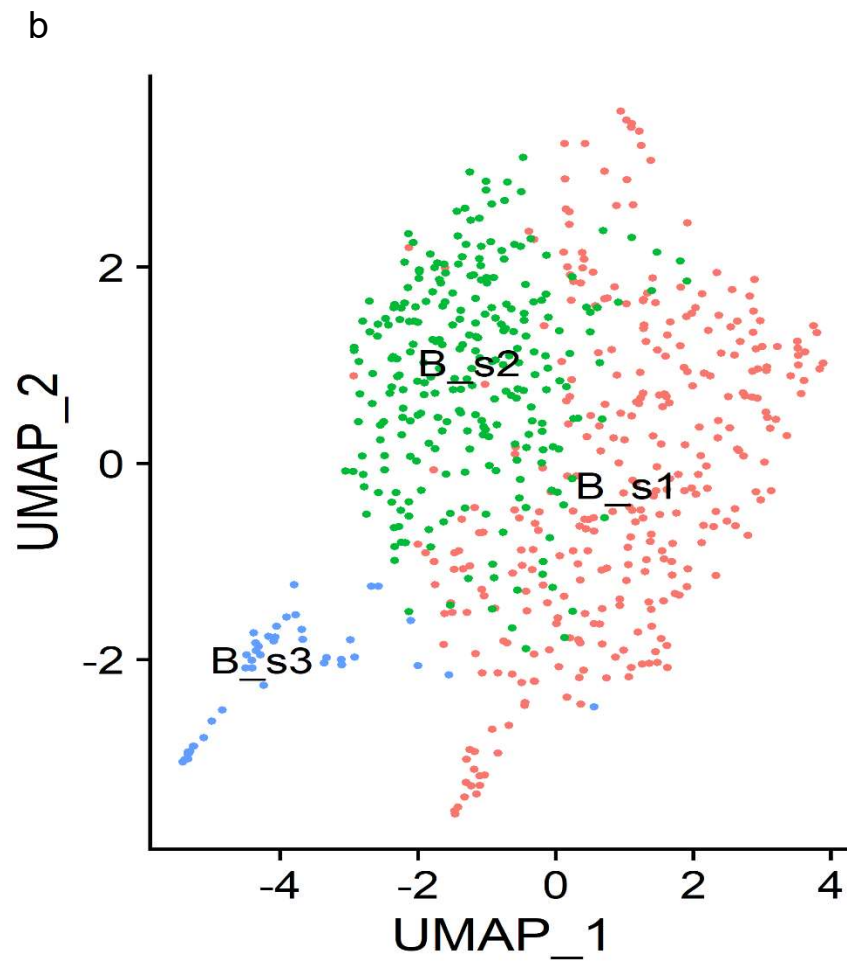

C

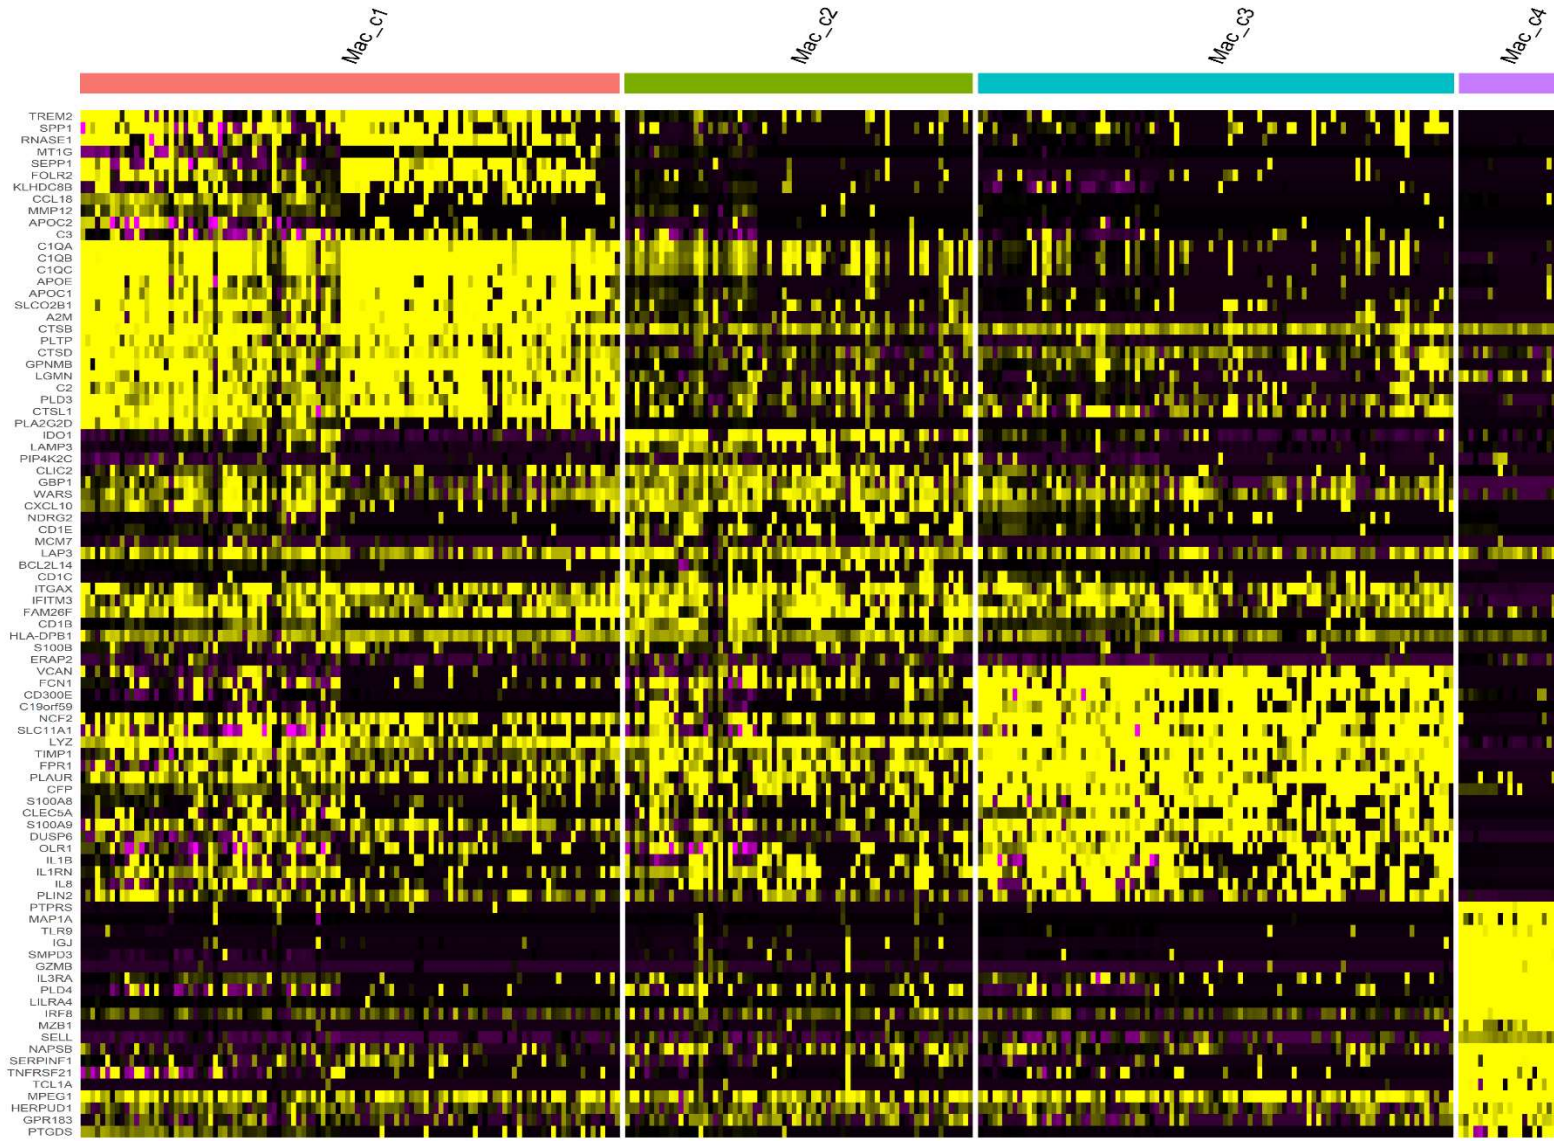

d

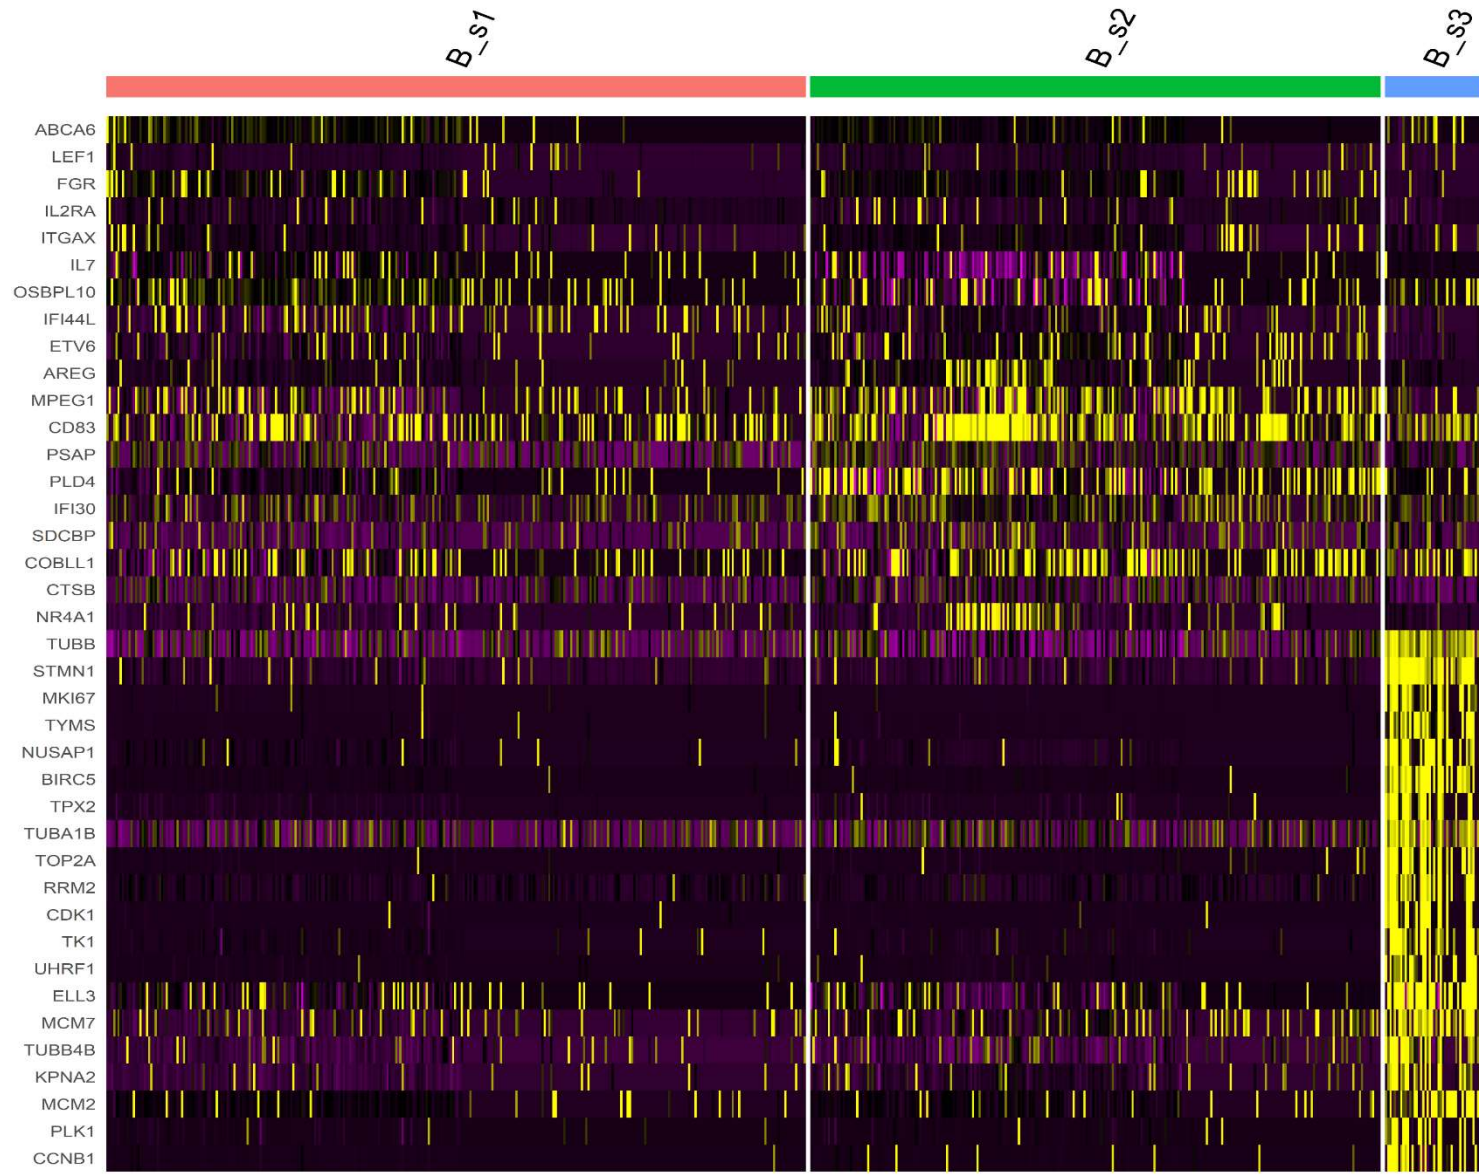

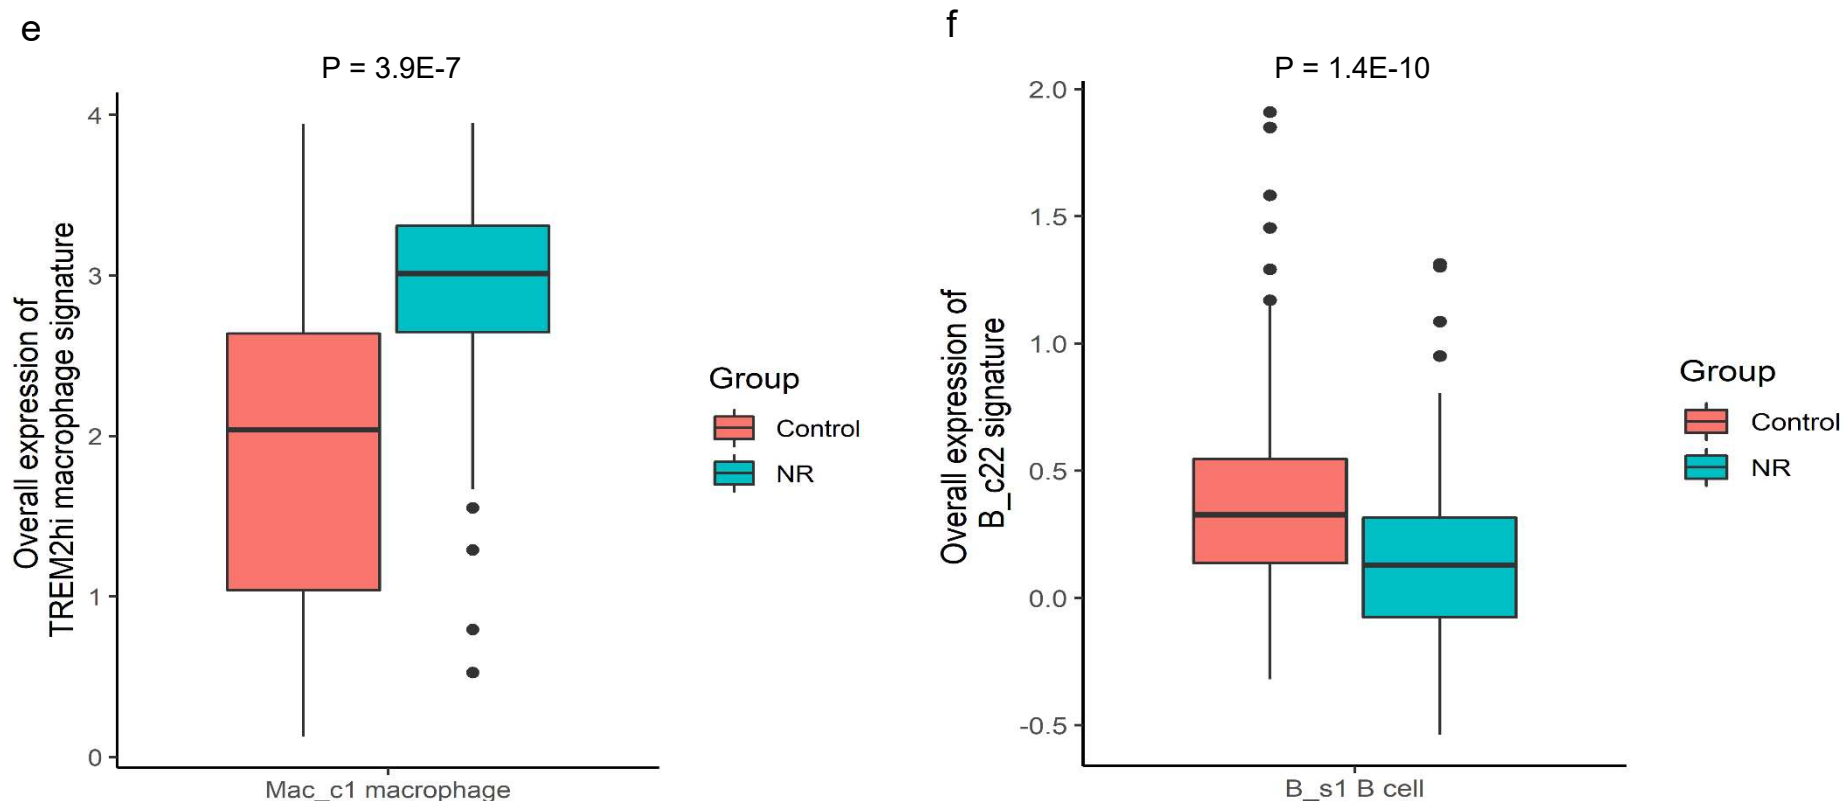

Supplementary Figure 8. Validation of the findings in melanoma using an independent scRNAseq dataset of melanoma - GSE115978. (a)-(b) The deeper clustering of the macrophages and B cells sequenced by Jerby-Arnon et al.'s scRNA-seq study showed the existence of the similar macrophage and B cell subpopulations that resemble our identified TREM2<sup>hi</sup> macrophages and B\_c22 B cells; (c) Heatmap of the four macrophage subclusters, which showed that the 'Mac\_c1' macrophage subcluster overexpressed the TREM2<sup>hi</sup> macrophage marker genes; (d) Heatmap of the three B cells subclusters, which showed that the 'B\_s1' B cell subcluster overexpressed the B\_c22 B cells marker genes; (e) the Mac\_c1 macrophage subset had significantly higher overall expression of the TREM2<sup>hi</sup> macrophage signature in the non-responders than the control samples; (f) The B\_s1 B cell subset had significantly lower overall expression of the B\_c22 B cell signature in the immunotherapy non-responders than the control samples. Center line, median. Box limits, upper and lower quartiles. Whiskers, 1.5 interquartile range. Points beyond whiskers, outliers. For (e) and (f), the two-sided Wilcoxon tests were performed with no adjustment for multiple comparisons.



a

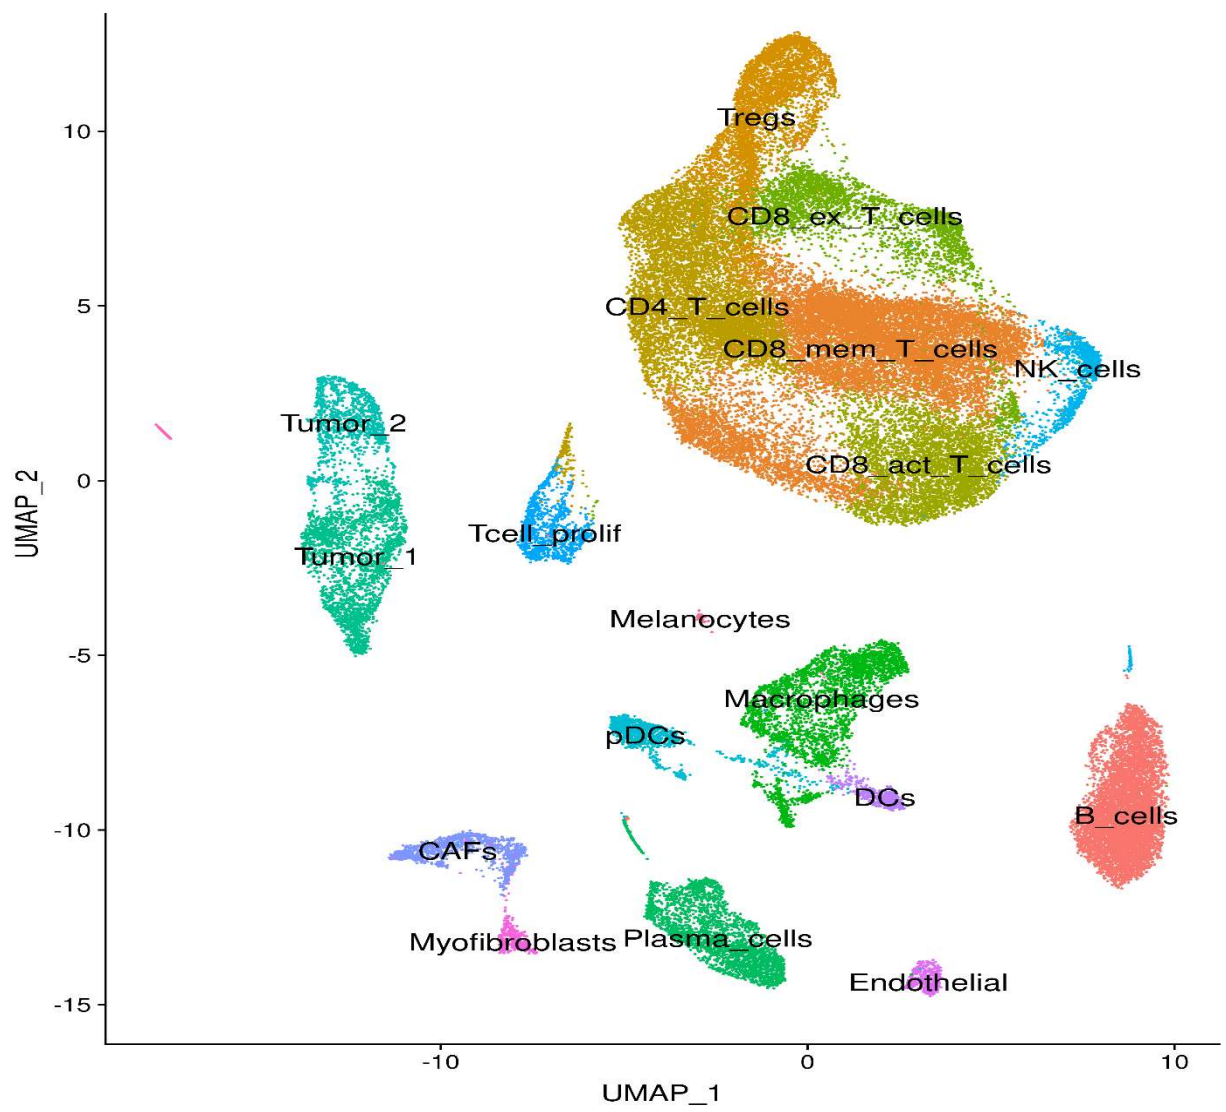

b

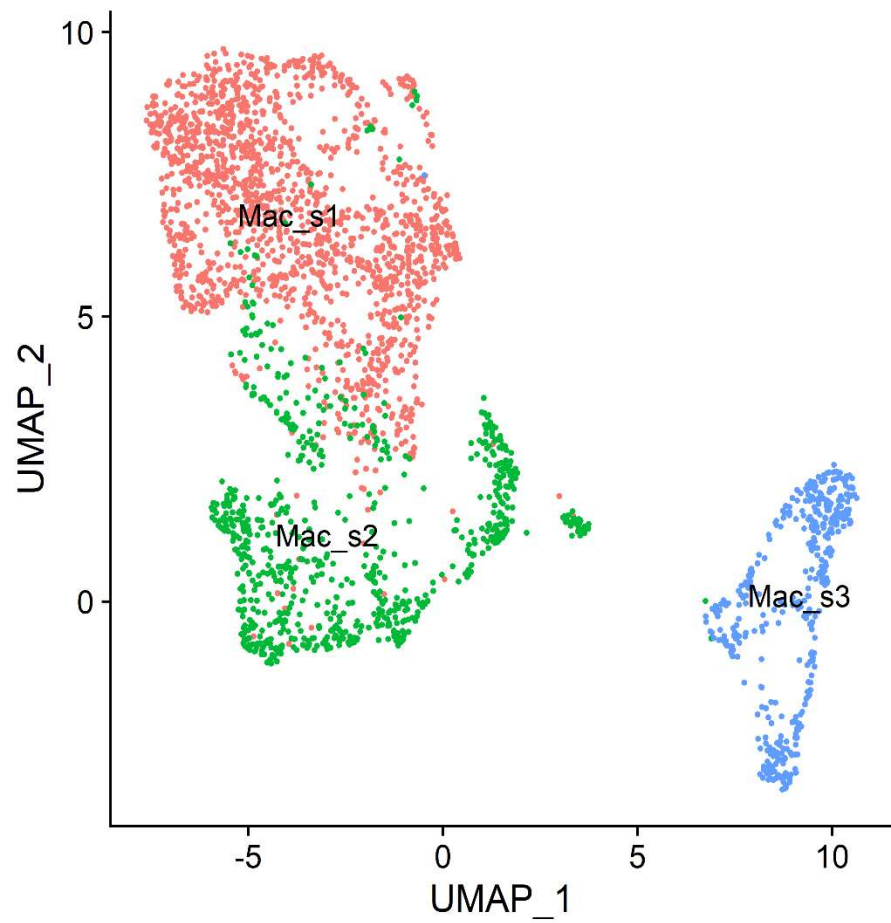

c

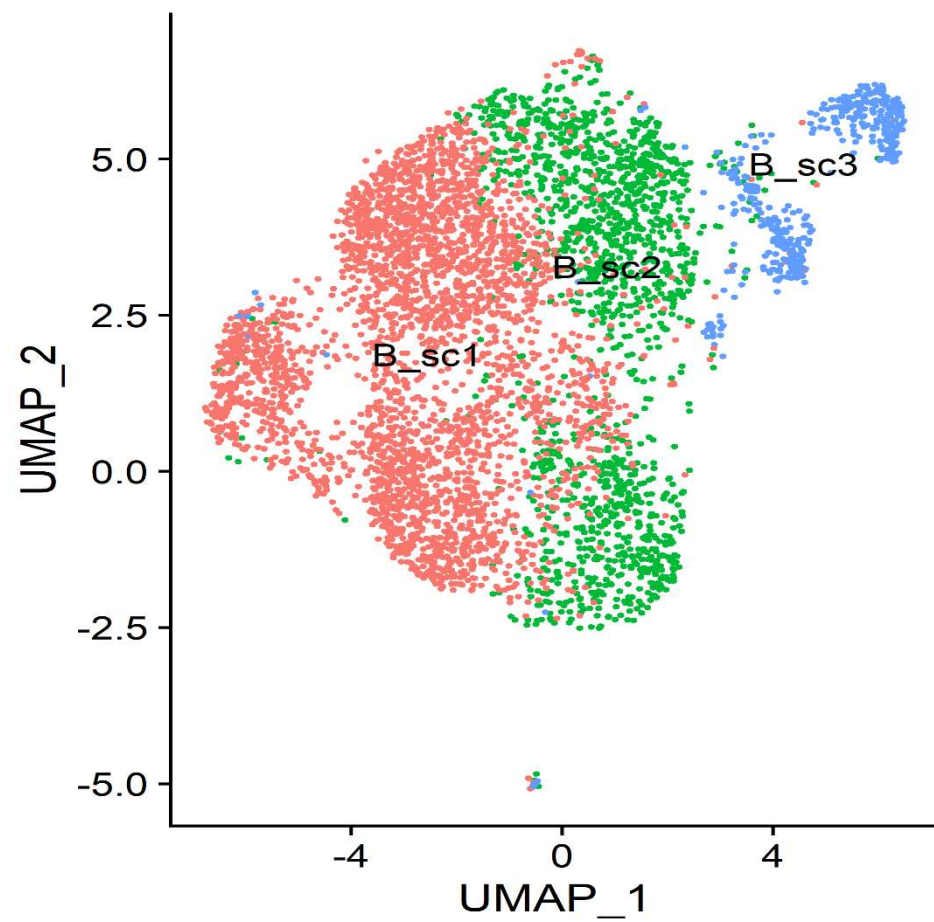

d

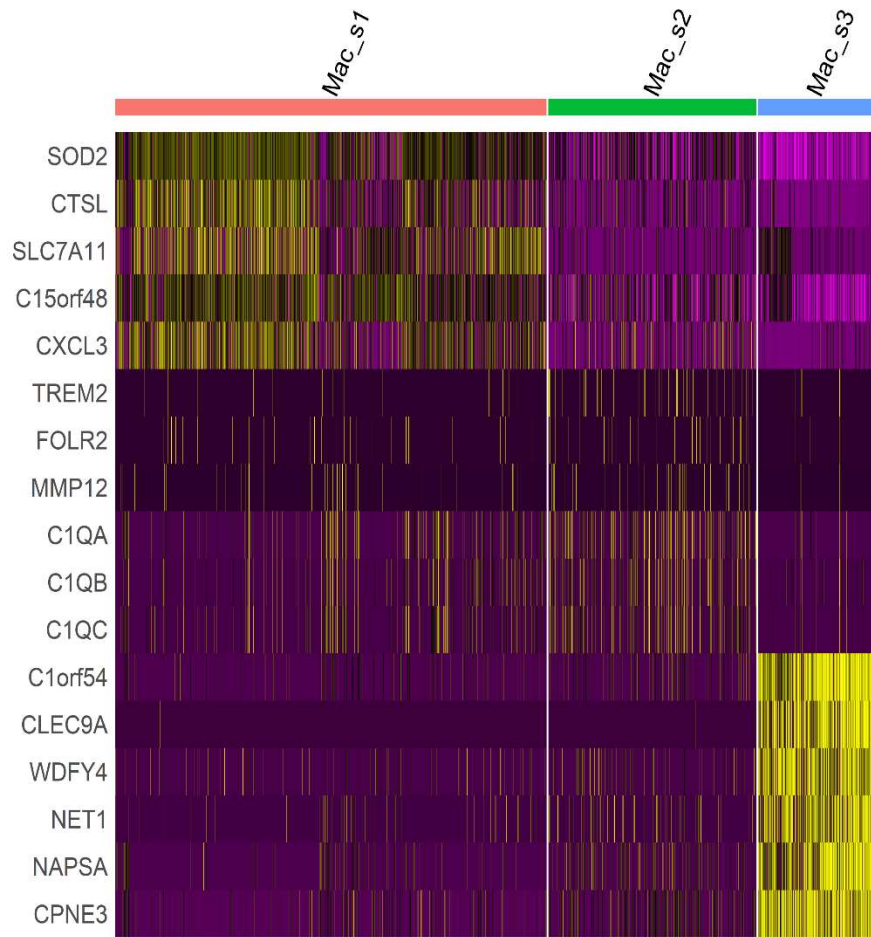

e

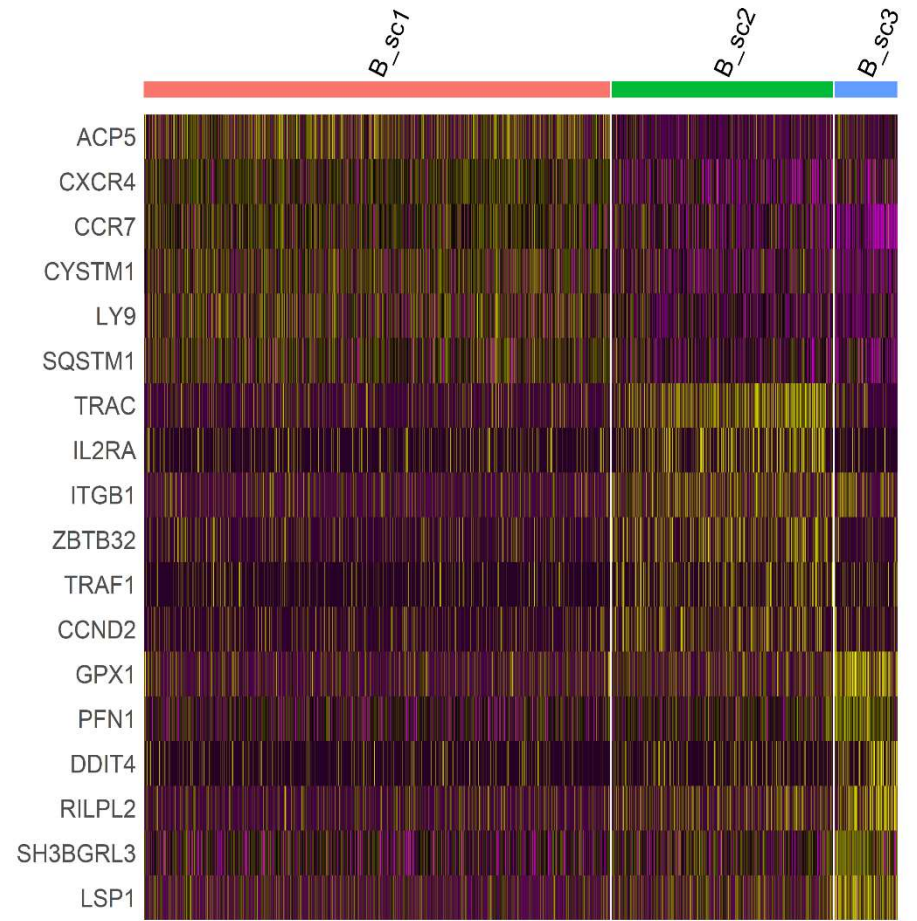

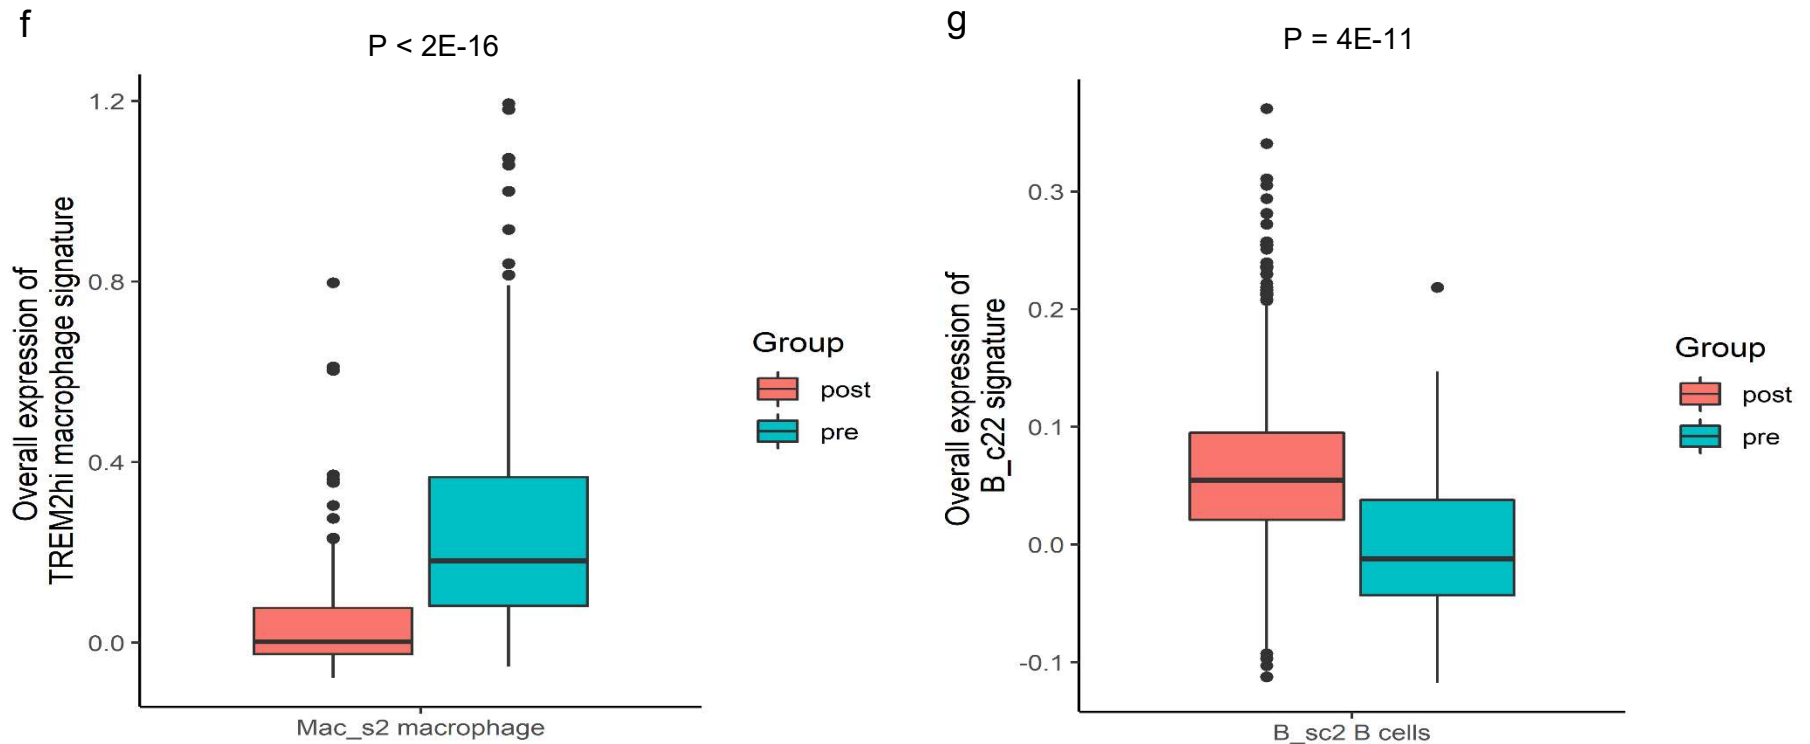

Supplementary Figure 9. Validation of the findings in melanoma using an scRNAseq dataset of basal cell carcinoma (BCC) - GSE123813. (a) General clustering analyses identified the overall macrophages and B cells populations; Finer clustering identified the macrophage (b) and B cell subpopulations (c) from the BCC tumors that are similar to the TREM2<sup>hi</sup> macrophages and B\_c22 B cells in the initial melanoma samples; (d) Heatmap showed that in the BCC dataset the 'Mac\_s2' macrophage subcluster overexpressed the TREM2<sup>hi</sup> macrophage marker genes; (e) Heatmap showed that 'B\_sc2' B cell subcluster overexpressed the B\_c22 B cells marker genes; (f) The Mac\_s2 macrophage subset had significantly decreased overall expression of the TREM2<sup>hi</sup> macrophage signature in the responsive BCC tumors after the anti-PD-1 therapy than the pretreatment BCC samples; (g) The B\_sc2 B cell subset had significantly higher overall expression of the B\_c22 signature in the post anti-PD-1 therapy responsive BCC tumors than the pretreatment BCC samples. Center line, median. Box limits, upper and lower quartiles. Whiskers, 1.5 interquartile range. Points beyond whiskers, outliers. For (f) and (g), the two-sided Wilcoxon tests were performed with no adjustment for multiple comparisons.

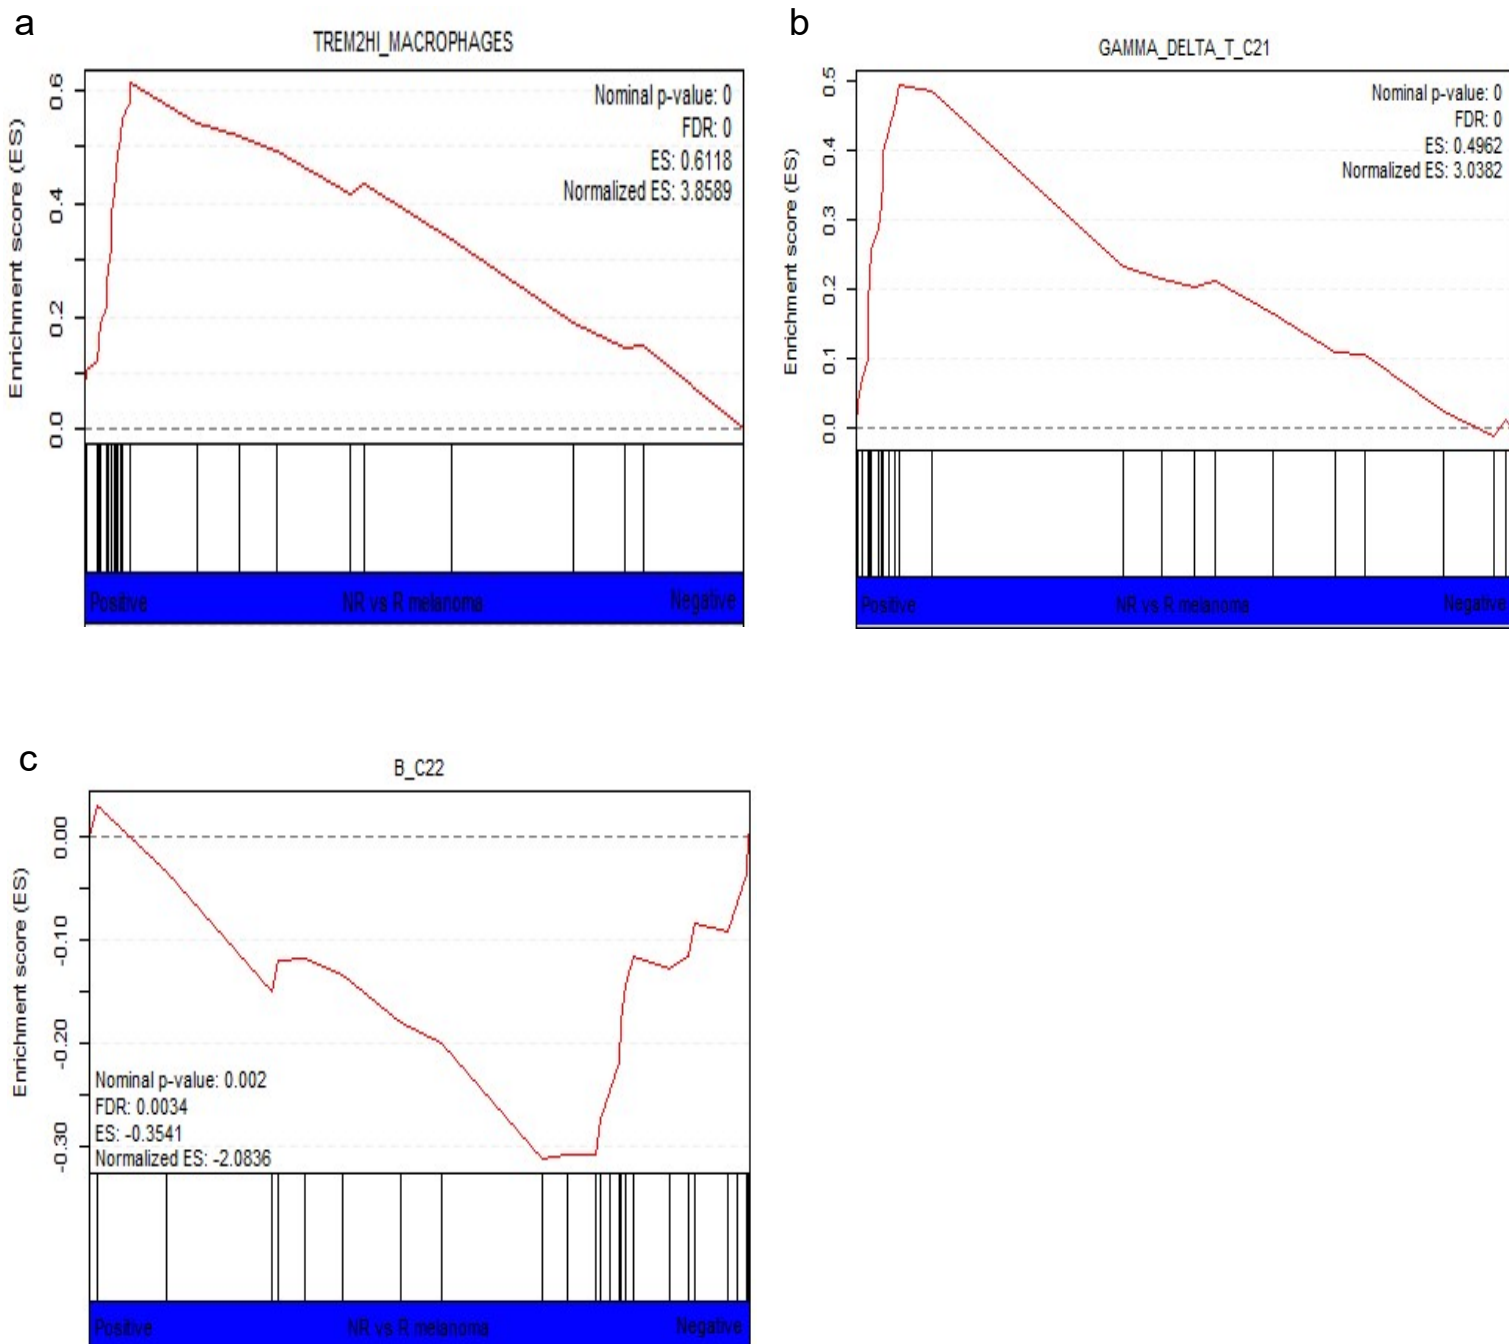

Supplementary Figure 10. The enrichment of the ImmuneCells.Sig signature for the characteristic genes of the immune cell subpopulations. The dataset - GSE78220 was used in this analysis. This ICT outcome signature was positively enriched for the characteristic genes of the (a) TREM2<sup>hi</sup> M $\phi$ , (b) Tgd\_c21, and negatively enriched for the (c) B\_c22.

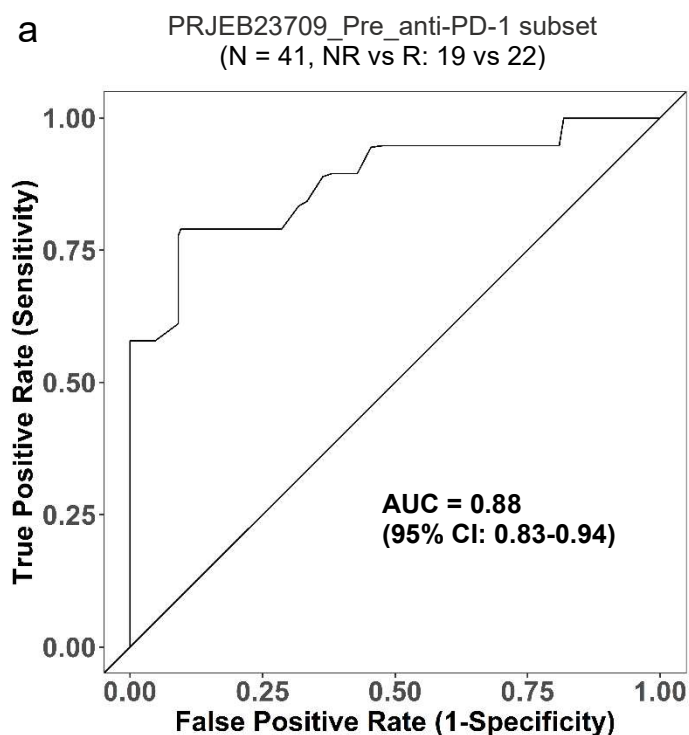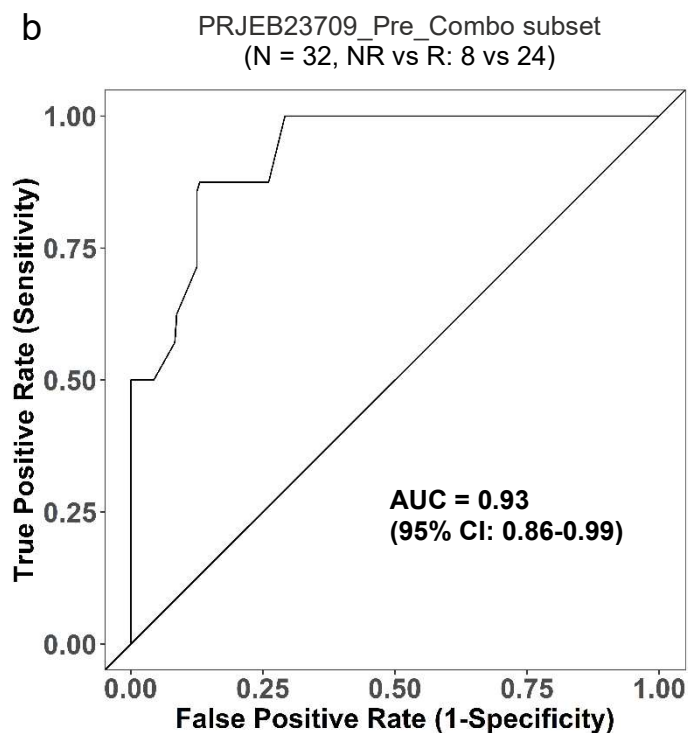

Supplementary Figure 11. Evaluation of the ImmuneCells.Sig signature. The dataset - PRJEB23709 was used in this analysis. The performance of the ImmuneCells.Sig signature in predicting ICT responders based on the pre-treatment melanoma biopsies from patients subjected to different ICT regimen. ImmuneCells.Sig can accurately distinguish responders from non-responders in both Pre\_anti-PD-1 and Pre\_Combo subgroups (anti-PD-1 plus anti-CTLA-4) as can be seen in the ROC (receiver operating characteristic) curves of the (a) PRJEB23709\_Pre\_anti-PD-1 subset and (b) PRJEB23709\_Pre\_Combo subset.

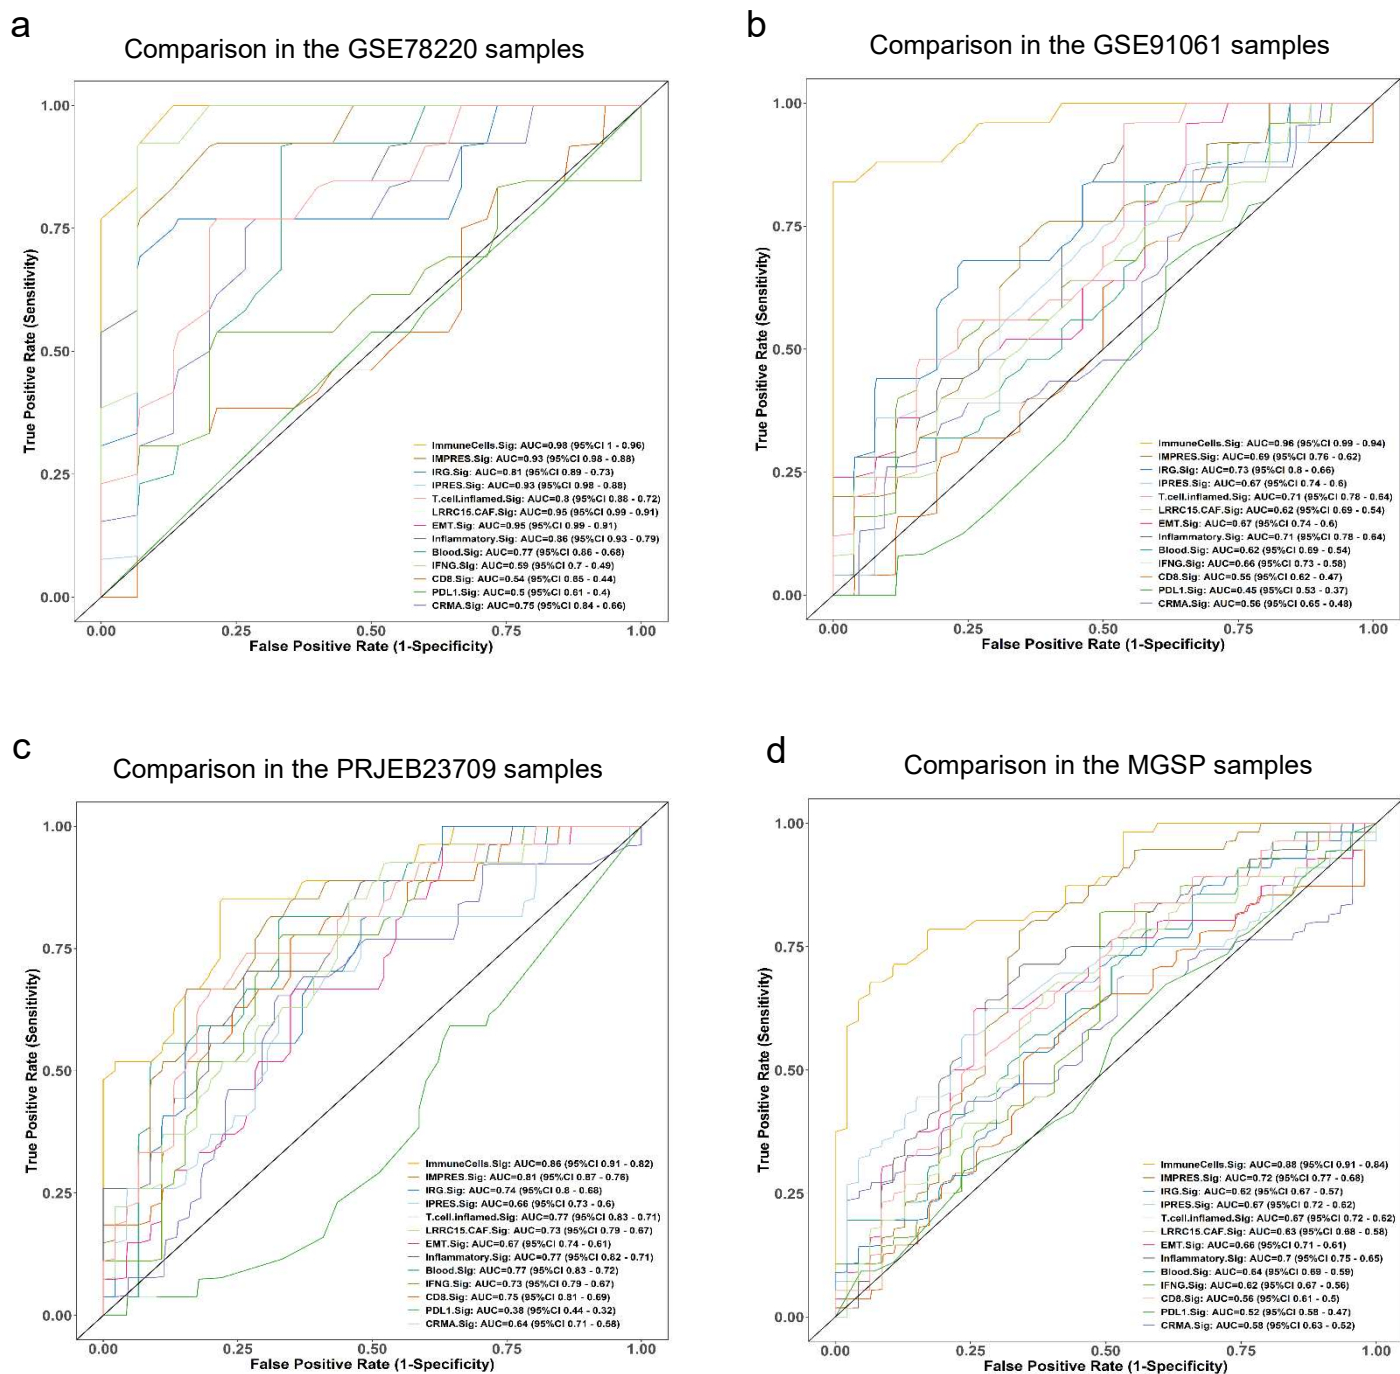

Supplementary Figure 12. Comparison of the performance of ImmuneCells.Sig with other ICT response signatures. The multiple ROC (receiver operating characteristic) curves are shown for the 13 ICT response signatures in (a) for the GSE78220 dataset; (b) for the GSE91061 dataset; (c) for the PRJEB23709 dataset and (d) for the MGSP dataset.

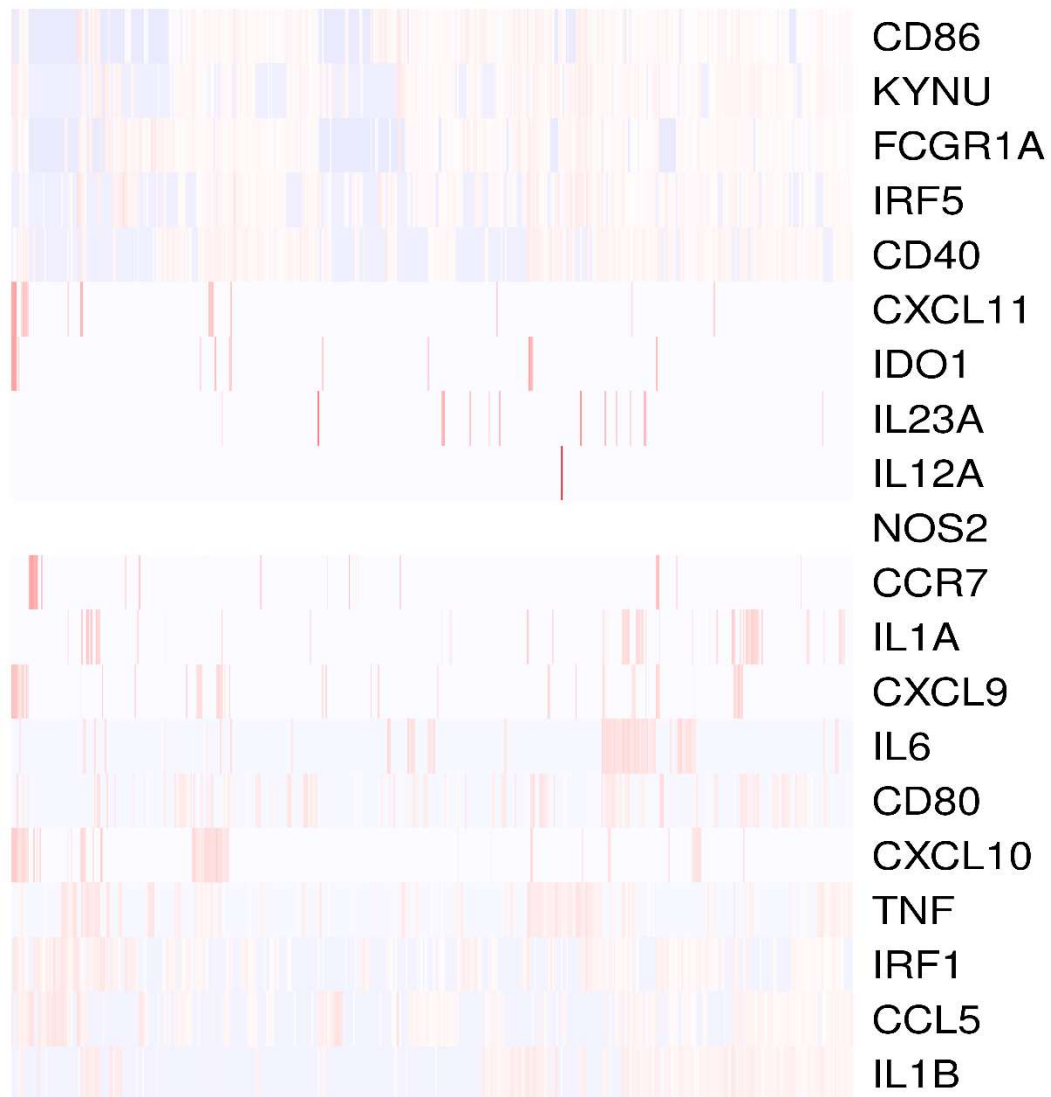

Supplementary Figure 13. The expression of M1 macrophage marker genes in the TREM2<sup>hi</sup> population cells. The scRNA-seq dataset - GSE120575 was used in this analysis.



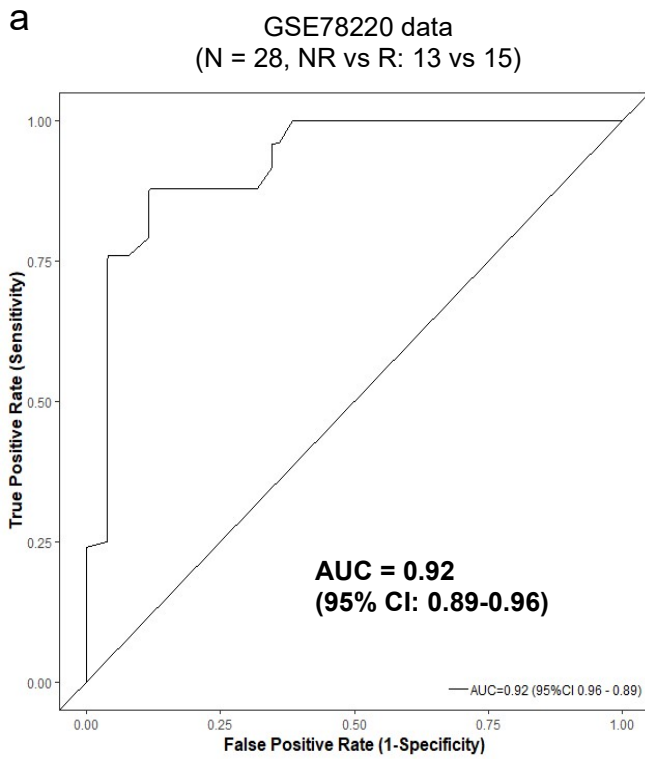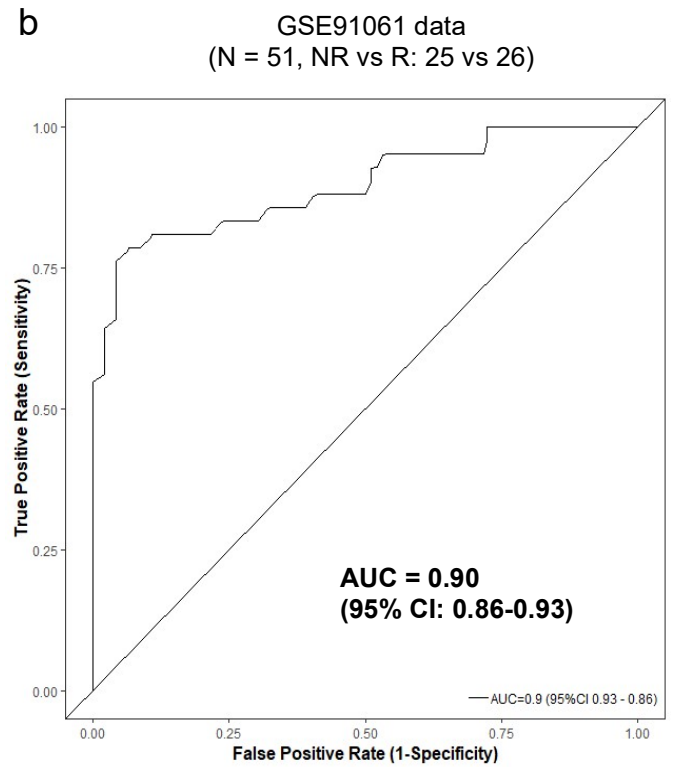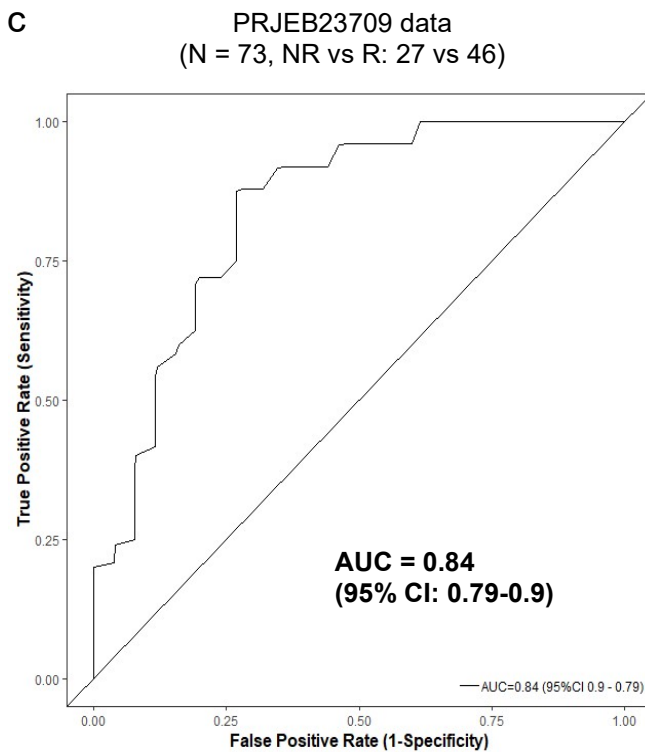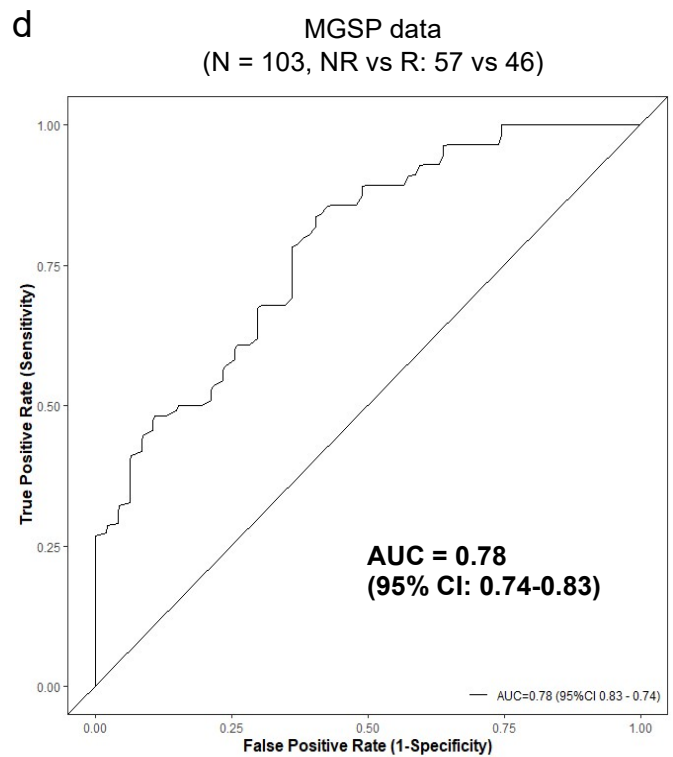

Supplementary Figure 14. Performance of a signature of immune cells. Using the gene signature of the three component cell clusters identified from single-cell data (TREM2<sup>hi</sup> macrophages, Tgd\_c21  $\gamma\delta$  T cells and B\_c22 B cells) to perform ICT outcome prediction analyses. The AUC values from this signature were 0.92, 0.90, 0.84 and 0.78 for the datasets of (a) GSE78220, (b) GSE91061, (c) PRJEB23709, and (d) MGSP, respectively.

| Cluster | Immune cell population   | Cell number | R_Percentage (% of CD45+) | NR_Percentage (% of CD45+) | NRvsR_Fold Difference |
|---------|--------------------------|-------------|---------------------------|----------------------------|-----------------------|
| 1       | CD8 <sup>+</sup> T cells | 2502        | 11.45                     | 17.39                      | 1.5                   |
| 2       | Regulatory T cells       | 1886        | 12.94                     | 10.87                      | -1.2                  |
| 3       | CD4 <sup>+</sup> T cells | 1521        | 11.99                     | 7.96                       | -1.5                  |
| 4       | CD8 <sup>+</sup> T cells | 990         | 7.80                      | 5.18                       | -1.5                  |
| 5       | CD8 <sup>+</sup> T cells | 926         | 6.00                      | 5.52                       | -1.1                  |
| 6       | Macrophages/Monocytes    | 931         | 2.97                      | 7.14                       | 2.4                   |
| 7       | CD8 <sup>+</sup> T cells | 867         | 5.84                      | 5.05                       | -1.2                  |
| 8       | γδ T cells               | 781         | 3.97                      | 5.22                       | 1.3                   |
| 9       | MKI67hi Lymph.           | 753         | 2.37                      | 5.79                       | 2.4                   |
| 10      | CD8 <sup>+</sup> T cells | 658         | 3.61                      | 4.26                       | 1.2                   |
| 11      | CD8 <sup>+</sup> T cells | 650         | 3.77                      | 4.10                       | 1.1                   |
| 12      | Macrophages/Monocytes    | 542         | 0.32                      | 4.88                       | 15.1                  |
| 13      | B cells                  | 520         | 7.03                      | 1.20                       | -5.8                  |
| 14      | B cells                  | 519         | 5.63                      | 1.92                       | -2.9                  |
| 15      | NK cells                 | 490         | 3.15                      | 2.94                       | -1.1                  |
| 16      | MKI67hi Lymph.           | 357         | 1.69                      | 2.45                       | 1.5                   |
| 17      | B cells                  | 330         | 4.03                      | 0.99                       | -4.1                  |
| 18      | Plasma cells             | 309         | 2.07                      | 1.81                       | -1.1                  |
| 19      | Dendritic cells          | 274         | 0.84                      | 2.12                       | 2.5                   |
| 20      | CD8 <sup>+</sup> T cells | 202         | 0.59                      | 1.58                       | 2.7                   |
| 21      | γδ T cells               | 146         | 0.11                      | 1.31                       | 12.1                  |
| 22      | B cells                  | 99          | 1.47                      | 0.16                       | -9.3                  |
| 23      | Macrophages/Monocytes    | 38          | 0.36                      | 0.17                       | -2.1                  |

Supplementary Table 1. The percentages of the cluster-specific cells of the CD45<sup>+</sup> immune cells for each group (Responder - 'R'; Non-Responder - 'NR'). The scRNA-seq dataset - GSE120575 was used in this analysis.

| Non-responders | Sample group              | Sample number | Single-cell number |
|----------------|---------------------------|---------------|--------------------|
| G1             | NR-before-anti-PD-1       | 8             | 2604               |
| G2             | NR-before-anti-CTLA4      | 1             | 288                |
| G3             | NR-before-anti-CTLA4+PD-1 | 1             | 311                |
| G4             | NR-after-anti-PD-1        | 18            | 6334               |
| G5             | NR-after-anti-CTLA4       | 0             | 0                  |
| G6             | NR-after-anti-CTLA4+PD-1  | 3             | 1190               |
| Responders     | Sample group              | Sample number | Single cell number |
| G7             | R-before-anti-PD-1        | 4             | 1191               |
| G8             | R-before-anti-CTLA4       | 1             | 229                |
| G9             | R-before-anti-CTLA4+PD-1  | 4             | 1305               |
| G10            | R-after-anti-PD-1         | 5             | 1524               |
| G11            | R-after-anti-CTLA4        | 0             | 0                  |
| G12            | R-after-anti-CTLA4+PD-1   | 3             | 1315               |

Supplementary Table 2. Melanoma sample number and single cell number of stratified groups. The scRNA-seq dataset - GSE120575 was used in this analysis.
