# Supplementary material for: A gene expression signature of TREM2hi macrophages and γδ T cells predicts immunotherapy response
Source: PubMed Central journal article supplement (PMC7545100; doi:10.1038/s41467-020-18546-x), 2020-10-08
Supplement: 41467_2020_18546_MOESM3_ESM.pdf [file 41467_2020_18546_MOESM3_ESM.pdf]

## **Descriptions of Additional Supplementary Files**

### **Supplementary Data 1.**

**Description:** Single-cell differential expression (DE) analyses results of cluster 6 macrophages (Inflammatory macrophages).

### **Supplementary Data 2.**

**Description:** Single-cell differential expression (DE) analyses results of cluster 12 macrophages (TREM2hi macrophages).

### **Supplementary Data 3.**

**Description:** Single-cell differential expression (DE) analyses results of cluster 23 macrophages (Immunoregulatory related macrophages).

### **Supplementary Data 4.**

**Description:** Reactome pathways analysis for cluster 6 macrophages (IDO1hi inflammatory macrophages) specific genes detected by Seurat.

### **Supplementary Data 5.**

**Description:** Reactome pathways analysis for cluster 12 macrophages (TREM2hi macrophages) specific genes detected by Seurat.

### **Supplementary Data 6.**

**Description:** Reactome pathways analysis for cluster 23 macrophages (Immunoregulatory related macrophages) specific genes detected by Seurat.

### **Supplementary Data 7.**

**Description:** Single-cell differential expression analyses results of the comparison of Tgd\_c21 to Tgd\_c8 cells.

### **Supplementary Data 8.**

**Description:** Single-cell differential expression analyses results of the comparison of B\_c22 to other B cell clusters.

### **Supplementary Data 9.**

**Description:** Detailed information of the genes of ICT outcome signature - ImmuneCells.Sig.
